# Supplementary material for: Tree rings reveal two strong solar proton events in 7176 and 5259 BCE
Source: Research Square preprint supplement (doi:10.21203/rs.3.rs-753272/v1), 2021-08-10
Supplement: Supplementary file 1 [file af548e128f06f17e1adc1018.pdf]

## Supplementary Information

### S1 Dendrochronology

*Dendrochronological dating of waterlogged oak samples from the river Main, Germany (M49 and M234)*

The subfossil oak (*Quercus* sp.) samples, M49 and M234, used for this study were collected from waterlogged trunks discovered during gravel quarrying along the River Main in the 1970s and 1980s. Samples were obtained from a veneer mill near Bamberg, which obtained timber from a series of gravel pits along an 80 km stretch of the River Main between Schweinfurt (50.05N; 10.24E) and Lichtendels (50.15N; 11.05E). The provenance of these particular timbers is not known exactly.

These samples were selected for inclusion in this study because the growth rings of the trees were > 1mm in width, and the samples were without distortion caused by growth anomalies or knots that would make the dissection of the single tree-rings for radiocarbon dating difficult.

The wet samples from the gravel pits were prepared using a scalpel blade to remove the rough wood from the sample surface to expose the tree-ring pattern. The ring-widths were then measured to a precision of 1/100 mm using a micro-computer based travelling stage.

The individual ring-width series were cross-dated against the Hohenheim Southern German Oak Chronology<sup>1</sup>. The correlation values obtained are given in Table S1.1. The ring-width series of M234 was further compared with the Göttingen South German Oak Chronology<sup>2</sup>, which over this time period was constructed separately from the Hohenheim master chronology. The correlation values obtained are also given in Table S1.1. Figure S1.1 shows the ring-width series of M49 and M234 on a logarithmic scale against the Hohenheim master chronology.

**Table S1.1:** overlaps (years) / Gleichläufigkeit (%) / t-values (Ballie and Pilcher 1973) between M49, M234, the Göttingen South German Riverine Oak Chronology<sup>3</sup> with M49 and M234 removed, and the Hohenheim Holocene German Oak Chronology<sup>1</sup>.

|                                           | Hohenheim South German oak | M49             | M234           |
|-------------------------------------------|----------------------------|-----------------|----------------|
| Göttingen South German oak                | 8797 / 78 / 91.5           |                 |                |
| Göttingen South German oak (without M234) |                            |                 | 133 / 67 / 6.5 |
| Hohenheim South German oak                |                            | 118 / 69 / 10.0 | 133 / 69 / 8.5 |
| M49                                       |                            |                 | 39 / 66 / 3.0  |

The good visual matching of the ring-width series (Figure S1.1), along with the correlation values obtained (Table S1.1) dates the 118-ring series, M49, as spanning 7276–7159 BCE and the 133-ring series, M234, as spanning 7197–7065 BCE. The calendar dates provided are historic dates BCE without the year zero.

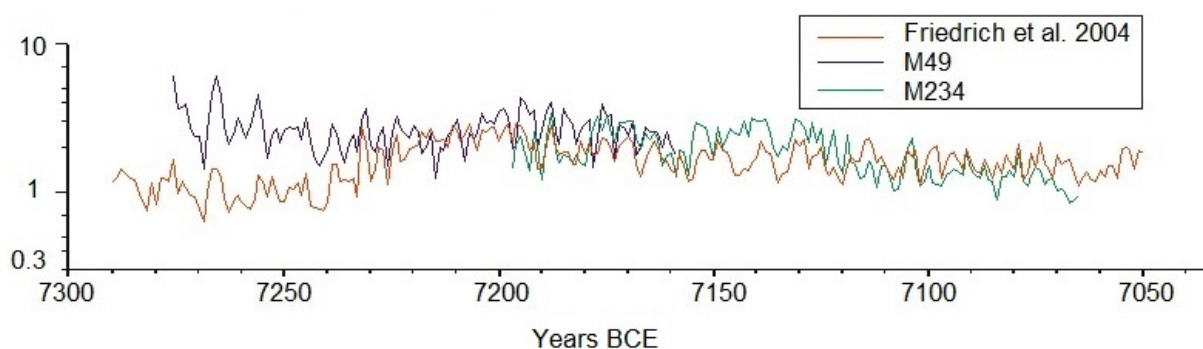

**Figure S1.1:** (a) Ring-width series of M49 and M234 on a logarithmic scale against the Hohenheim master chronology (Friedrich et al. 2004).

Timbers from the Main river gravels were originally waterlogged, but have subsequently been allowed to dry out naturally. The remaining parts of the samples are stored in the Department of Palynology and Climate Dynamics, Albrecht-von-Haller Institute for Plant Sciences, Georg-August-Universität-Göttingen, Wilhelmsplatz 1, 37073 Göttingen, Germany. Ring-width data for the two tree slices sampled for radiocarbon dating are provided in Table S1.2.

Dissection for radiocarbon dating was undertaken by Alison Arnold and Robert Howard of the Nottingham Tree-ring Dating Laboratory. The samples to be used were cleaned with a razor blade and the annual growth rings marked. At this stage it became apparent that 22 rings from the centre of M232, and two from the outside, had crumbled during storage, and only the rings spanning 7175–7067 BC were available for dissection.

The annual growth rings were split from the bulk sample using a scapel blade. Whole ring samples, including both earlywood and latewood, were provided to the ETH laboratory from M49 (7276–7160 BCE) and M232 (7175–7067 BCE). Replicate whole ring samples, including both earlywood and latewood, were provided to the Bristol laboratory from M49 (7181–7160 BCE). Further replicate whole ring samples from M49 (n=29) and M234 (n=13) have been archived by Historic England.

The annual growth rings from M49 (7178–7175 BCE) were further divided using a scapel into separate samples comprising earlywood only and latewood only, which were provided to both the ETH and Bristol laboratories.

Finally, the annual growth ring for 7177 BCE from M49 was split into early and late earlywood (EW1 and EW2), and early and late latewood (LW1 and LW2) and the samples supplied to the ETH laboratory.

**Table S1.2:** Ring-width data for the timbers which provided single-ring samples for radiocarbon calibration (Heidelberg format)

HEADER:  
KeyCode=SM001D\_0  
DataFormat=Tree  
Project=S  
Country=S  
LocationCharacteristics=M  
SiteCode=00  
TreeNo=1D  
CoreNo=0  
SeriesType=Single curve  
StatisticalDataTreatment=0  
DataType=Ringwidth  
Unit=mm  
Dated=Dated  
Length=118  
DateBegin=-7276  
DateEnd=-7159  
Species=Qusp  
Location=M49  
PersId=HL  
LastRevisionDate=01.04.90  
MissingRingsBefore=25  
DeltaMissingRingsBefore=10  
MissingRingsAfter=20

DeltaMissingRingsAfter=.  
Comment=SM000490.!OJ/\_

DATA:Single

|     |     |     |     |     |     |     |     |     |     |
|-----|-----|-----|-----|-----|-----|-----|-----|-----|-----|
| 587 | 359 | 361 | 380 | 268 | 233 | 231 | 141 | 250 | 447 |
| 586 | 438 | 272 | 203 | 234 | 306 | 271 | 225 | 275 | 353 |
| 442 | 278 | 165 | 237 | 260 | 208 | 252 | 265 | 257 | 266 |
| 221 | 309 | 213 | 160 | 146 | 162 | 184 | 279 | 243 | 190 |
| 155 | 203 | 239 | 179 | 291 | 360 | 199 | 180 | 226 | 265 |
| 148 | 249 | 316 | 268 | 241 | 226 | 275 | 250 | 176 | 195 |
| 243 | 121 | 195 | 185 | 235 | 253 | 298 | 245 | 156 | 242 |
| 224 | 245 | 333 | 283 | 293 | 281 | 336 | 359 | 315 | 189 |
| 201 | 417 | 392 | 323 | 345 | 197 | 252 | 338 | 395 | 247 |
| 206 | 353 | 311 | 279 | 207 | 254 | 277 | 304 | 143 | 223 |
| 380 | 318 | 326 | 161 | 275 | 267 | 238 | 297 | 171 | 193 |
| 270 | 248 | 247 | 240 | 197 | 251 | 196 | 171 | 0   | 0   |

HEADER:

KeyCode=SM006I\_0

DataFormat=Tree

Project=S

Country=S

LocationCharacteristics=M

SiteCode=00

TreeNo=6I

CoreNo=0

SeriesType=Single curve

StatisticalDataTreatment=0

DataType=Ringwidth

Unit=mm

Dated=Dated

Length=133

DateBegin=-7197

DateEnd=-7065

Species=Qusp

Location=M 234

PersId=HL

LastRevisionDate=01.04.90

MissingRingsBefore=0

DeltaMissingRingsBefore=0

MissingRingsAfter=0

DeltaMissingRingsAfter=0

Comment=SM002340.!OJ/ Probe fehlt

DATA:Single

|     |     |     |     |     |     |     |     |     |     |
|-----|-----|-----|-----|-----|-----|-----|-----|-----|-----|
| 144 | 207 | 230 | 177 | 135 | 250 | 202 | 119 | 231 | 331 |
| 184 | 153 | 171 | 169 | 155 | 173 | 155 | 146 | 218 | 261 |
| 315 | 254 | 313 | 244 | 208 | 285 | 283 | 295 | 293 | 224 |
| 192 | 242 | 222 | 241 | 223 | 146 | 172 | 177 | 123 | 184 |
| 182 | 128 | 241 | 288 | 275 | 267 | 206 | 168 | 268 | 196 |
| 229 | 262 | 241 | 238 | 296 | 230 | 306 | 291 | 291 | 298 |
| 242 | 190 | 167 | 201 | 187 | 239 | 302 | 294 | 269 | 208 |
| 284 | 211 | 261 | 150 | 188 | 252 | 153 | 129 | 234 | 158 |
| 149 | 121 | 125 | 157 | 145 | 105 | 146 | 145 | 119 | 99  |
| 102 | 154 | 192 | 226 | 145 | 108 | 116 | 148 | 112 | 110 |
| 106 | 126 | 129 | 141 | 132 | 126 | 183 | 139 | 126 | 121 |
| 146 | 118 | 116 | 87  | 124 | 125 | 136 | 124 | 175 | 114 |
| 108 | 127 | 144 | 135 | 111 | 117 | 120 | 100 | 101 | 97  |
| 82  | 87  | 92  | 0   | 0   | 0   | 0   | 0   | 0   | 0   |

*Dendrochronological dating of the bog oak samples from Derrymacfall, Co. Armagh, Northern Ireland (Q 2729 and Q 2750)*

In July 1977, slices were collected from seventy-one bog oak (*Quercus* sp.) timbers from the townland of Derrymacfall, just south of Lough Neagh, Co. Armagh, Northern Ireland (54° 28'N, 6° 28'W).

The wet samples were prepared using a scalpel blade to remove the rough wood from the surface of the sample and to expose the tree-ring pattern. If the wood sample was soft or the ring pattern needed to be clarified, a razor blade was used. Finely ground chalk was rubbed onto the prepared surface to define the annual tree-ring boundaries more clearly for measurement. The ring-widths were measured to a precision of 1/50mm using a travelling stage between November 1979 and September 1980. Sometimes more than one radius was measured for an individual sample (e.g. Q2737A/B), and so some ring series are a mean of two or more measurement series on the same sample.

The ring-width series of nine of these samples as well as those of two samples from Loughmagarry, Co. Antrim (Q2527 and Q2528; 54° 52'N, 6° 17'W) were included in the Derrymacfall 2 master chronology (Table S1.3). The construction of the chronology followed the procedures described by Baillie<sup>4</sup>. Samples with the best correlation values were combined to form sub-site masters. These were then used to date others samples. The other dated samples were incorporated into a new sub-site master until a coherent master chronology was formed. The individual samples were then compared with each other giving the correlation values presented in the *t*-value matrix (Table S1.4). The correlation *t*-values are based on CROS84<sup>5</sup>. At this time, the Derrymacfall 2 master chronology could not be dated by dendrochronology.

**Table S1.3:** Details of the cross-matched samples from the Derrymacfall 2 master chronology (?h/s = outermost measured ring is possible heartwood/sapwood boundary)

| Sample                         | Rings | Sapwood Rings | Absolute Dating (BCE) |
|--------------------------------|-------|---------------|-----------------------|
| <i>Derrymacfall, Co Armagh</i> |       |               |                       |
| Q2682                          | 159   | No sapwood    | BCE 5429 – 5271       |
| Q2717                          | 160   | No sapwood    | BCE 5446 – 5287       |
| Q2720                          | 100   | No sapwood    | BCE 5353 – 5254       |
| Q2729                          | 181   | 24            | BCE 5356 – 5176       |
| Q2734                          | 91    | No sapwood    | BCE 5318 – 5228       |
| Q2737M                         | 176   | No sapwood    | BCE 5457 – 5282       |
| Q2750                          | 267   | ?h/s          | BCE 5428 – 5162       |
| Q2779                          | 190   | No sapwood    | BCE 5389 – 5200       |
| Q2781                          | 139   | No sapwood    | BCE 5419 – 5281       |
| <i>Loughmagarry, Co Antrim</i> |       |               |                       |
| Q2527                          | 104   | No sapwood    | BCE 5378 – 5275       |
| Q2528                          | 133   | No sapwood    | BCE 5392 – 5260       |

In 1989 re-measurement of bog oak samples from a number of sites was undertaken. This work produced local site chronologies which cross-dated both with the Derrymacfall 2 master chronology and with the original Belfast Long Chronology (BLC5000). When the Derrymacfall 2 master chronology was compared with these chronologies extremely significant and consistent correlation values were found with the Tullyroan 10 and the Motorway 2 chronology.

**Table S1.4:** *t*-value matrix for ring-width series in the Derrymacfall 2 master chronology (- = no correlation value; nsm = non-significant match; nh = not highest match; \* = significant match; \*\* = very significant match; \*\*\* = extremely significant match)

| QUB ID | Q2717  | Q2682   | Q2750   | Q2781   | Q2528   | Q2779   | Q2527   | Q2729   | Q2720   | Q2734   |
|--------|--------|---------|---------|---------|---------|---------|---------|---------|---------|---------|
| Q2737M | 2.33nh | 6.59*** | 2.87nh  | 3.55nsm | 2.96nm  | 5.32*** | 2.82nh  | 3.47nsm | 4.02nsm | -       |
| Q2717  | -      | 4.18nsm | 3.67nsm | 3.40nsm | 1.86nh  | 6.41*** | 0.38nm  | 3.33nsm | 5.38*** | -       |
| Q2682  | -      | -       | 5.46*** | 6.94*** | 2.62nh  | 7.08*** | 1.60nh  | 3.05nsm | 5.09*** | -       |
| Q2750  | -      | -       | -       | 3.97nsm | 4.51nsm | 5.66*** | 3.04nh  | 5.87*** | 7.44*** | 3.80nsm |
| Q2781  | -      | -       | -       | -       | 3.55nsm | 6.51*** | 3.20nsm | 2.48nh  | 4.28*   | -       |
| Q2528  | -      | -       | -       | -       | -       | 3.92*   | 7.31*** | 2.97vwm | 2.45nh  | -       |
| Q2779  | -      | -       | -       | -       | -       | -       | 2.49nh  | 3.58nsm | 6.88*** | 2.81nh  |
| Q2527  | -      | -       | -       | -       | -       | -       | -       | 2.68nh  | 1.29nh  | -       |
| Q2729  | -      | -       | -       | -       | -       | -       | -       | -       | 4.24*   | 2.98nsm |
| Q2720  | -      | -       | -       | -       | -       | -       | -       | -       | -       | 3.29nsm |

The Derrymacfall 2 master chronology consists of eleven samples (Figure S1.2). It is 296 years in length and dates from BCE 5457 to BCE 5162. Table S1.5 gives the correlation values of this master chronology with other site chronologies from Ireland. Only correlation values over  $t = 4$  are included in the table. The correlation  $t$ -values are based on CROS84<sup>5</sup>.

**Table S1.5:** Correlation values for the 296-year Derrymacfall 2 master chronology with other site and regional chronologies (\*\* = extremely significant match ; \* = very significant match)

| Site chronology         | Start and end date of chronology | Correlation value with Derrymacfall 2 |
|-------------------------|----------------------------------|---------------------------------------|
| Tullyroan 10, Co Armagh | 5334BCE to 4680BCE               | $t = 8.39***$                         |
| Motorway 2, Co Armagh   | 5474BCE to 5228BCE               | $t = 5.75***$                         |
| Killyleagh 1, Co Down   | 5236BCE to 4829BCE               | $t = 4.62**$                          |

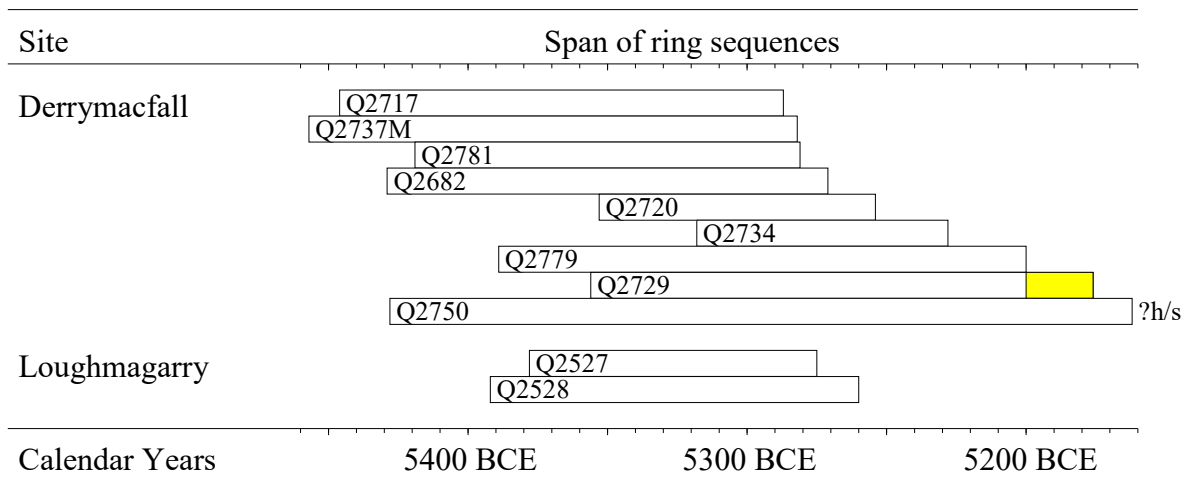

**Figure S1.2:** Bar diagram showing the relative positions of the dated samples. White bar = heartwood; yellow bar = sapwood; ?h/s = outermost measured ring is possible heartwood/sapwood boundary

Timbers from Derrymacfall were originally waterlogged, but subsequently have been allowed to dry out naturally. The remainder of the samples are stored in the Dendrochronology Laboratory, School of Natural and Built Environment, Queen’s University, Belfast. Ring-width data for all the measured samples from Derrymacfall can be found at [http://www.chrono.qub.ac.uk/bennett/dendro\\_data/dendro.html](http://www.chrono.qub.ac.uk/bennett/dendro_data/dendro.html).

Two samples from the Derrymacfall 2 site chronology, Q2729 and Q2750 (Table S1.6), have been used to supply single-year samples for radiocarbon calibration. For the selected period, the trees with the widest annual growth rings were chosen, so that extracting the individual annual growth rings is as easy as possible. The samples to be used were cleaned with a razor blade and the annual growth rings marked. The annual growth rings were split from the bulk sample using a scalpel bade and the early wood growth was removed using a scalpel. This processing means that the wood samples provided only have the latewood part of the annual growth ring.

Sample Q2729 was used to supply samples from 5300 BCE to 5211 BCE inclusive, and sample Q2750 was used to supply samples from 5210 BCE to 5175 BCE inclusive. Those single-ring samples that weighed more than 120mg were divided further using a scalpel to supply duplicate samples of 90 single rings for inter-laboratory replication.

**Table S1.6:** Ring-width data for the timbers which provided single-ring samples for radiocarbon calibration (Heidelberg format)

HEADER:

Key Code = Q2729

Data Format = Tree

Location = Derrymacfall, Co. Armagh

Length = 181

Date Begin = 5356BC

Date End = 5176BC

Dated = Dated

Comment = EDH 17-June-1980 Close to centre 24 sapwood rings not complete

Key No = Q2729

Project = Derrymacfall, Co. Armagh

Species = QUSP  
Tree No = Q2729  
Pith = -  
WaldKante = ---  
Sapwood Rings = 24  
Unit = 1/50 mm  
Data Type = Ring width  
Series Type = Single curve  
Series Start = Ring width  
Series End = Ring width  
Global Math Comment Count = 0  
Image Count = 0  
Comment Count = 0  
Bibliography Count = 0  
DATA: Single

56 46 56 76 66 84 104 75 77 73  
41 51 66 73 78 76 96 91 78 78  
100 71 73 59 58 62 53 43 84 71  
75 95 74 139 126 144 131 140 108 88  
75 85 53 36 42 47 73 73 67 70  
110 132 212 158 177 126 107 113 85 99  
80 98 106 90 92 92 97 103 150 157  
113 130 127 81 85 96 95 94 82 100  
79 94 81 99 105 126 118 106 94 67  
65 49 63 48 61 52 44 43 64 55  
63 51 69 58 58 62 63 61 61 63  
68 91 65 60 65 75 54 53 53 53  
43 44 32 30 29 27 36 29 29 34  
39 98 61 72 28 26 26 31 39 34  
46 45 64 69 49 51 55 46 35 30  
29 25 29 29 30 46 45 34 44 31  
36 31 37 33 31 38 37 36 23 28  
30 31 34 60 74 60 43 28 31 34  
19

HEADER:

Key Code = Q2750  
Data Format = Tree  
Location = Derrymacfall, Co. Armagh  
Length = 267  
Date Begin = 5428BC  
Date End = 5162BC  
Dated = Dated  
Comment = EDH 9-Aug-1980 Close to centre no sapwood possible H/S boundary  
Key No = Q2750  
Project = Derrymacfall, Co. Armagh  
Species = QUSP  
Tree No = Q2750  
Pith = -  
WaldKante = ---  
Unit = 1/50 mm  
Data Type = Ring width  
Series Type = Single curve  
Series Start = Ring width  
Series End = Ring width  
Global Math Comment Count = 0  
Image Count = 0  
Comment Count = 0

Bibliography Count = 0

DATA: Single

15 16 17 5 14 4 19 15 12 11  
11 9 19 21 25 22 14 7 26 16  
8 21 33 40 73 48 32 23 17 26  
23 50 69 76 28 35 48 49 44 57  
37 28 23 85 95 43 48 49 77 84  
127 164 157 105 97 66 67 86 101 87  
41 25 31 42 21 13 17 13 25 19  
16 13 17 19 18 22 17 33 40 38  
33 16 8 13 12 18 16 25 40 42  
18 25 24 11 10 8 12 11 7 9  
16 15 17 13 11 16 18 19 19 32  
28 31 33 37 19 10 12 15 30 29  
28 33 40 47 30 38 59 51 28 25  
18 18 19 29 59 22 16 23 28 39  
66 45 25 23 26 46 39 44 80 66  
40 62 64 48 44 50 43 21 25 18  
21 29 37 27 55 32 45 41 32 24  
60 102 84 42 57 41 29 33 46 37  
28 46 27 26 30 34 20 45 30 31  
27 22 15 36 32 33 29 40 60 14  
21 24 56 50 35 26 17 12 6 13  
11 9 7 9 17 15 25 31 23 20  
21 24 30 47 33 35 34 60 47 40  
27 28 18 22 48 62 79 60 58 51  
29 46 37 56 48 46 52 59 49 16  
23 26 19 13 23 29 22 28 12 18  
13 21 28 38 44 47 33

### *Bristlecone Pine*

Two bristlecone pine (*Pinus Longaeva* D.K. Bailey) samples were used in this study. For the 5259 BCE event, sample MWK80-101 was selected from the calendar dated master Methuselah Walk bristlecone pine chronology<sup>6</sup>. The sample derives from a single *Pinus longaeva* D.K.Bailey tree which grew at the Methuselah Walk site (MWK) in the White Mountains of California in the western USA. The remnant tree was preserved in a dry, high altitude (c.2900 m a.s.l.) mountain environment. The full tree sampled had 747 rings with no pith, bark or waney edge present. Standard convention for bristlecone dating is via the use of the astronomical calendar (AD/BC with 0) for which details are provided in Ferguson *et al.*<sup>6</sup>. Chronologies are constructed using a combination of graphical skeleton plotting<sup>7</sup>, and / or tree-ring measurement, and then statistical verification using COFECHA<sup>8</sup>. For MWK80-101, calendar dates were assigned relative to the master MWK chronology and the sample was lagged successively by 25 years using COFECHA12K version 6.06P. The sample spans -5821 to -5075 (747 years, 30 50-yr segments, 0 flags and demonstrates excellent correlation with the master MWK chronology;  $r = 0.770$ ). The COFECHA outputs are provided below in AD/BC with 0. Two sub-samples of MWK80-101 were marked with dated years and sampled from the cross-dated main sample. The sub-samples were cut to be c. 5 mm thick relative to the transverse section. The upper and lower surface were lightly sanded (preserving original pin-holes) but removing any surface contamination and excess resins which come up to the sample surface over time. The upper, lower and radial surfaces were clearly marked with the pin-holes and measurements re-checked prior to dissection. Dissection was carried out using the astronomical calendar (AD/BC with 0) under times 20 magnification using a binocular microscope and steel dissecting blade. The same blade was used to remove any residual contamination possibilities (pinholes, any residual cells from the previously dissected year of interest) prior to sampling each separate year of interest. Samples were dissected



working from youngest to oldest and packed in pre-marked foil packets. We note that a correction of 2 years was applied to Wes Fergusons original 1966 CE dating of this part of the MWK chronology due to an observation by Lamarche and Harlan in 1973<sup>9</sup> that Ferguson had incorrectly added what he thought were two likely missing rings to his chronology in -2141 and -2680. Chris Baisan and Mathew Salzer have since demonstrated that the first of these was a clerical error and the second a false ring, placed in 1966 by Ferguson, so both these erroneous years are removed from the master chronology used in this study.

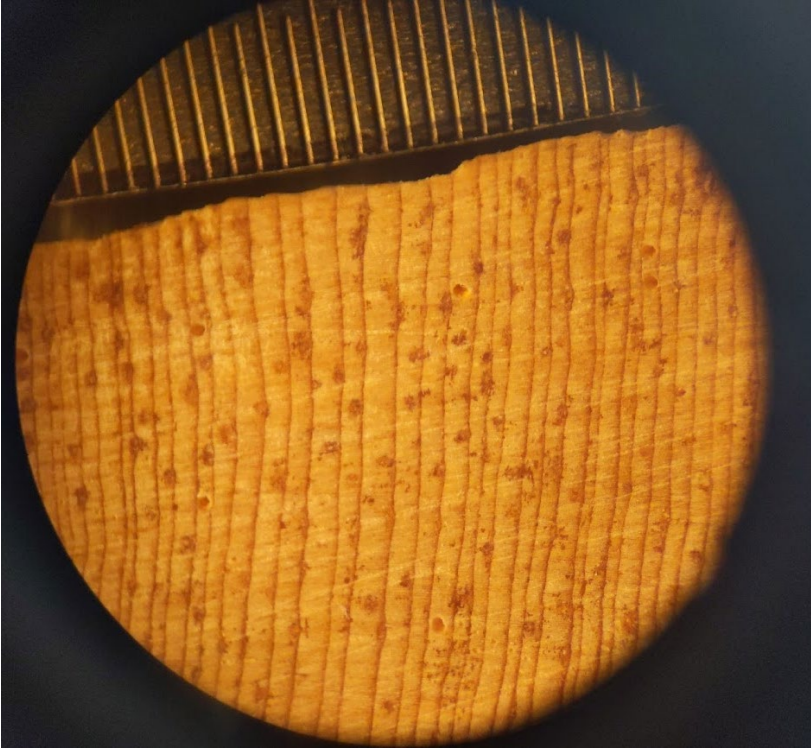

Figure S1.3: Dissected rings of sample MWK80-101 with 1mm ruler for scale. Double pinhole is the year -5250.

COFECHA12K version 6.06P output showing correlations of individual 50-year dated segments, lagged 25 years from MWK-80-101:

Flags: A = correlation under .3281 but highest as dated; B = correlation higher at other than dated position

**-5700 to -5176**

|    |        |            |     |     |     |     |     |     |     |     |     |     |     |     |     |     |     |     |     |     |     |     |     |     |     |
|----|--------|------------|-----|-----|-----|-----|-----|-----|-----|-----|-----|-----|-----|-----|-----|-----|-----|-----|-----|-----|-----|-----|-----|-----|-----|
| 2  | 03-876 | -6261-5548 | .63 | .49 | .79 | .81 | .64 | .65 |     |     |     |     |     |     |     |     |     |     |     |     |     |     |     |     |     |
| 33 | 67-035 | -5553-4714 |     |     |     |     |     |     | .57 | .57 | .62 | .61 | .58 | .52 | .65 | .78 | .78 | .77 | .62 | .67 | .79 | .65 | .62 |     |     |
| 38 | 69-202 | -6223-5096 | .75 | .65 | .58 | .58 | .57 | .74 | .79 | .78 | .81 | .74 | .65 | .77 | .86 | .80 | .80 | .75 | .80 | .89 | .78 | .77 |     |     |     |
| 40 | 70-020 | -5460-4708 |     |     |     |     |     |     |     |     |     |     |     |     | .67 | .68 | .72 | .80 | .76 | .79 | .68 | .72 | .89 | .80 | .78 |
| 43 | 70-043 | -6377-5408 | .62 | .58 | .59 | .59 | .55 | .52 | .65 | .71 | .78 | .80 | .59 |     |     |     |     |     |     |     |     |     |     |     |     |
| 44 | 70-046 | -6066-5008 | .70 | .71 | .76 | .65 | .52 | .63 | .62 | .70 | .77 | .68 | .51 | .52 | .55 | .69 | .81 | .61 | .53 | .63 | .70 | .63 |     |     |     |
| 46 | 70-176 | -6045-5039 | .67 | .62 | .73 | .79 | .64 | .64 | .66 | .69 | .64 | .71 | .70 | .53 | .67 | .75 | .83 | .56 | .57 | .70 | .65 | .61 |     |     |     |

48 71-059 -5922-5302 .76 .82 .84 .87 .73 .55 .60 .79 .90 .79 .69 .61 .70 .37 .44  
 49 71-060 -5880-5324 .62 .50 .62 .55 .41 .59 .43 .53 .71 .70 .58 .63 .83 .63 .62  
 50 71-061 -5419-4931 .81 .80 .82 .80 .75 .86 .90 .85 .88  
 53 71-161 -5340-4819 .59 .64 .77 .85 .73 .69  
 55 72-104 -5722-4960 .69 .74 .79 .78 .67 .65 .53 .63 .81 .70 .58 .77 .87 .57 .67 .85 .86 .78 .62 .67  
 56 72-175 -6059-5080 .58 .68 .76 .84 .74 .68 .80 .85 .86 .79 .79 .85 .84 .69 .75 .79 .86 .89 .82 .82  
 61 77-104 -5747-4487 .68 .78 .84 .87 .82 .67 .53 .63 .76 .74 .66 .74 .82 .64 .74 .85 .86 .89 .77 .73  
 72 77-151 -5230-4748 .67 .74  
 76 77-162 -5673-4821 .70 .82 .86 .80 .77 .77 .79 .80 .76 .79 .80 .84 .84 .91 .93 .88 .85 .79 .78  
 83 78-026 -6065-5445 .75 .57 .72 .90 .67 .63 .70 .72 .84 .81  
 89 78-075 -5598-4575 .73 .66 .70 .73 .80 .74 .66 .65 .80 .81 .84 .84 .70 .74 .81 .81  
 92 79-026 -6166-5458 .70 .64 .84 .84 .76 .57 .56 .68 .80  
 95 79-058 -6012-4899 .81 .78 .83 .87 .75 .64 .63 .68 .76 .70 .78 .81 .76 .75 .85 .88 .89 .87 .81 .86  
 104 79-085 -5377-4989 .67 .66 .74 .63 .66 .84 .52 .52  
 119 79-136 -6245-5448 .77 .75 .71 .75 .69 .54 .58 .70 .80 .80  
 125 80-101 -5821-5075 .78 .66 .70 .77 .73 .79 .69 .58 .75 .74 .68 .85 .91 .74 .69 .74 .70 .79 .75 .74  
 127 80-103 -5361-4491 .81 .82 .83 .77 .77 .82 .78  
 133 80-110 -6022-4238 .74 .65 .78 .84 .64 .60 .78 .78 .77 .80 .80 .77 .79 .84 .83 .81 .80 .76 .72 .79  
 136 80-116 -5685-2822 .75 .68 .73 .81 .80 .81 .84 .79 .75 .83 .77 .81 .93 .84 .83 .72 .83 .92 .82 .76  
 184 93-031 -6133-5618 .62 .70 .74  
 234 XX-001 -6056-3998 .73 .61 .75 .84 .84 .64 .52 .60 .63 .65 .66 .69 .71 .57 .54 .67 .74 .73 .67 .68  
 235 XX-002 -5323-3562 .69 .80 .81 .76 .65  
 Av segment correlation .70 .67 .75 .78 .69 .64 .65 .70 .77 .74 .67 .72 .78 .72 .75 .74 .76 .81 .74  
 .73

**-5200 to -5051**

33 67-035 -5553-4714 .69 .67 .75 .75 .64  
 38 69-202 -6223-5096 .87 .81 .78 .73  
 40 70-020 -5460-4708 .79 .71 .75 .82 .79  
 44 70-046 -6066-5008 .44 .49 .51 .49 .73  
 46 70-176 -6045-5039 .53 .53 .62 .74 .83  
 50 71-061 -5419-4931 .79 .74 .79 .90 .75  
 53 71-161 -5340-4819 .63 .65 .77 .82 .59  
 55 72-104 -5722-4960 .75 .67 .71 .77 .78  
 56 72-175 -6059-5080 .90 .91 .90 .91  
 61 77-104 -5747-4487 .87 .79 .82 .86 .80

|                               |        |            |     |     |     |     |     |
|-------------------------------|--------|------------|-----|-----|-----|-----|-----|
| 72                            | 77-151 | -5230-4748 | .79 | .71 | .71 | .78 | .63 |
| 74                            | 77-158 | -5199-4495 | .62 | .65 | .67 | .67 | .59 |
| 76                            | 77-162 | -5673-4821 | .82 | .85 | .79 | .67 | .61 |
| 89                            | 78-075 | -5598-4575 | .78 | .81 | .82 | .66 | .53 |
| 93                            | 79-050 | -5198-4891 | .64 | .81 | .81 | .67 | .74 |
| 94                            | 79-057 | -5169-4706 | .80 | .80 | .86 | .85 |     |
| 95                            | 79-058 | -6012-4899 | .83 | .75 | .81 | .85 | .77 |
| 98                            | 79-075 | -5095-4163 |     |     |     |     | .83 |
| 101                           | 79-082 | -5077-4733 |     |     |     |     | .84 |
| 104                           | 79-085 | -5377-4989 | .62 | .65 | .76 | .80 | .72 |
| 107                           | 79-091 | -5102-4306 |     |     |     | .64 | .64 |
| 125                           | 80-101 | -5821-5075 | .78 | .83 | .88 | .91 | .92 |
| 127                           | 80-103 | -5361-4491 | .76 | .70 | .75 | .82 | .83 |
| 133                           | 80-110 | -6022-4238 | .78 | .81 | .84 | .84 | .70 |
| <b>-5200 to -5051 (cont.)</b> |        |            |     |     |     |     |     |
| 136                           | 80-116 | -5685-2822 | .80 | .78 | .79 | .86 | .85 |
| 234                           | XX-001 | -6056-3998 | .61 | .57 | .60 | .55 | .66 |
| 235                           | XX-002 | -5323-3562 | .70 | .74 | .77 | .87 | .84 |
| Av segment correlation        |        |            | .73 | .73 | .76 | .77 | .74 |

Samples from the MWK chronology show strong cross-matching with other independently developed bristlecone pine chronologies (across 5750 years) from Sheep Mountain and Indian Garden. These chronologies are available at: <https://catalog.data.gov/dataset/international-tree-ring-data-bank-itrd> and further details are provided in Salzer and Hughes, 2007<sup>10</sup>, 2010<sup>11</sup>, Salzer et al 2009<sup>12</sup>, 2014<sup>13</sup>, Kipfmüller, 2010<sup>14</sup>.

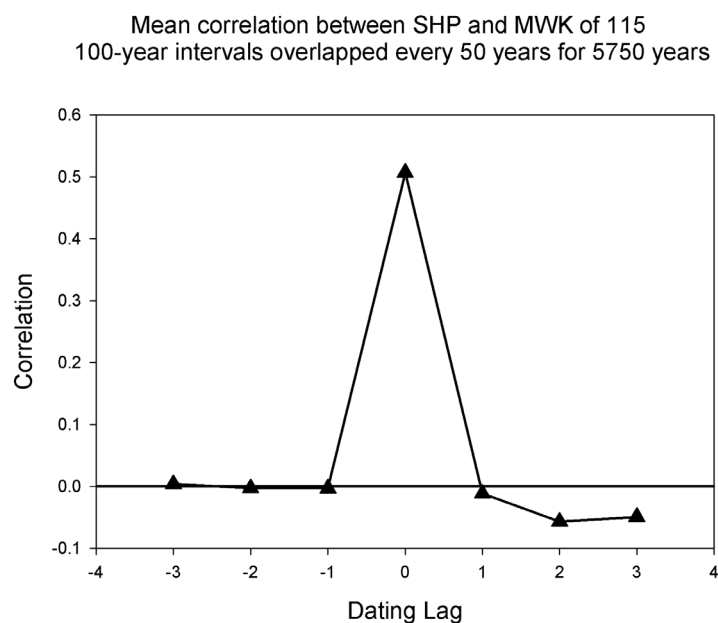

Tree-ring width measurements of the dissected subsamples used in this study are provided below:

| Tree ID     | Astronomical<br>calendar (AD/BC<br>with 0) | BCE  | BP   | 80-101B<br>SubSample1<br>Ringwidth | 80-101B<br>SubSample2<br>Ringwidth |
|-------------|--------------------------------------------|------|------|------------------------------------|------------------------------------|
| MWK-80-101B | -5270                                      | 5271 | 7220 | 0.408                              | 0.599                              |
| MWK-80-101B | -5269                                      | 5270 | 7219 | 0.464                              | 0.62                               |
| MWK-80-101B | -5268                                      | 5269 | 7218 | 0.644                              | 0.831                              |
| MWK-80-101B | -5267                                      | 5268 | 7217 | 0.634                              | 0.83                               |
| MWK-80-101B | -5266                                      | 5267 | 7216 | 0.526                              | 0.656                              |
| MWK-80-101B | -5265                                      | 5266 | 7215 | 0.704                              | 0.909                              |
| MWK-80-101B | -5264                                      | 5265 | 7214 | 0.502                              | 0.698                              |
| MWK-80-101B | -5263                                      | 5264 | 7213 | 0.76                               | 0.999                              |
| MWK-80-101B | -5262                                      | 5263 | 7212 | 0.628                              | 0.811                              |
| MWK-80-101B | -5261                                      | 5262 | 7211 | 0.47                               | 0.58                               |
| MWK-80-101B | -5260                                      | 5261 | 7210 | 0.61                               | 0.94                               |
| MWK-80-101B | -5259                                      | 5260 | 7209 | 0.29                               | 0.47                               |
| MWK-80-101B | -5258                                      | 5259 | 7208 | 0.342                              | 0.501                              |
| MWK-80-101B | -5257                                      | 5258 | 7207 | 0.506                              | 0.643                              |
| MWK-80-101B | -5256                                      | 5257 | 7206 | 0.414                              | 0.471                              |
| MWK-80-101B | -5255                                      | 5256 | 7205 | 0.434                              | 0.52                               |
| MWK-80-101B | -5254                                      | 5255 | 7204 | 0.644                              | 0.856                              |
| MWK-80-101B | -5253                                      | 5254 | 7203 | 0.232                              | 0.496                              |
| MWK-80-101B | -5252                                      | 5253 | 7202 | 0.498                              | 0.687                              |
| MWK-80-101B | -5251                                      | 5252 | 7201 | 0.278                              | 0.399                              |
| MWK-80-101B | -5250                                      | 5251 | 7200 | 0.338                              | 0.489                              |

For the 7176 BCE event, sample MWK85-051 from the non-calendar dated portion of the Methuselah Walk bristlecone pine master chronology was selected. This sample derives from a single *Pinus longaeva* D.K.Bailey tree which grew at the Methuselah Walk site (MWK) in the White Mountains of California in the western USA. The remnant tree was preserved in a dry, high altitude mountain environment. The full tree sampled had 474 rings with no pith, bark or waney edge present. This tree

is not part of the existing MWK master chronology but was placed in time by a possible dendrochronological match backed by limited, coarse resolution radiocarbon dating<sup>15</sup> (Salzer *et al.* 2019). The sample was selected with the aim of testing the possible placement and using annual <sup>14</sup>C to firmly connect this sample with the MWK master tree-ring chronology, extending this sequence securely back in time. Following dissection of the first sub-sample at annual resolution it became clear that an adjustment of around 40 years was required to this dating in order to detect the 7176 BCE event. A second sampling was carried out, with the floating astronomical calendar (AD/BC with 0) years adjusted to be 40 years older. The annual <sup>14</sup>C analysis of the second subsample detected the 7176 BCE event, indicating a further 1 year adjustment was necessary to align the floating bristlecone pine series with the other, annual <sup>14</sup>C measurements on calendar dated trees. This extends the continuous sequence for MWK over 10,398 years.

The dissected years and associated sub-sample ringwidths are provided in the table below:

| Dating A                                                   |                                                            | Dating B                         |                                                            |                                                            |                                  |
|------------------------------------------------------------|------------------------------------------------------------|----------------------------------|------------------------------------------------------------|------------------------------------------------------------|----------------------------------|
| (AD/BC with 0)                                             | (BP) NOT CALENDAR                                          |                                  | (AD/BC with 0) NOT CALENDAR                                | Dating B (BP) NOT CALENDAR                                 |                                  |
| SECURE – floating placement: course resolution radiocarbon | SECURE – floating placement: course resolution radiocarbon | MWK-85-051B Subsample1 Ringwidth | SECURE – floating placement: higher resolution radiocarbon | SECURE – floating placement: higher resolution radiocarbon | MWK-85-051B SubSample2 Ringwidth |
| -7186                                                      | 9136                                                       | 402                              | -7160                                                      | 9150                                                       | 0.682                            |
| -7185                                                      | 9135                                                       | 260                              | -7159                                                      | 9149                                                       | 1.036                            |
| -7184                                                      | 9134                                                       | 490                              | -7158                                                      | 9148                                                       | 0.684                            |
| -7183                                                      | 9133                                                       | 602                              | -7157                                                      | 9147                                                       | 0.472                            |
| -7182                                                      | 9132                                                       | 656                              | -7156                                                      | 9146                                                       | 0.614                            |
| -7181                                                      | 9131                                                       | 596                              | -7155                                                      | 9145                                                       | 0.5                              |
| -7180                                                      | 9130                                                       | 720                              | -7154                                                      | 9144                                                       | 0.194                            |
| -7179                                                      | 9129                                                       | 760                              | -7153                                                      | 9143                                                       | 0.066                            |
| -7178                                                      | 9128                                                       | 640                              | -7152                                                      | 9142                                                       | 0                                |
| -7177                                                      | 9127                                                       | 592                              | -7151                                                      | 9141                                                       | 0.25                             |
| -7176                                                      | 9126                                                       | 496                              | -7150                                                      | 9140                                                       | 0.186                            |
| -7175                                                      | 9125                                                       | 574                              | -7149                                                      | 9139                                                       | 0.398                            |
| -7174                                                      | 9124                                                       | 388                              | -7148                                                      | 9138                                                       | 0.646                            |
| -7173                                                      | 9123                                                       | 796                              | -7147                                                      | 9137                                                       | 0.498                            |
| -7172                                                      | 9122                                                       | 996                              | -7146                                                      | 9136                                                       | 0.54                             |
| -7171                                                      | 9121                                                       | 878                              | -7145                                                      | 9135                                                       | 1.476                            |

|       |      |     |       |      |       |
|-------|------|-----|-------|------|-------|
| -7170 | 9120 | 690 | -7144 | 9134 | 0.408 |
| -7169 | 9119 | 556 | -7143 | 9133 | 0.32  |
| -7168 | 9118 | 804 | -7142 | 9132 | 0.218 |
| -7167 | 9117 | 630 | -7141 | 9131 | 0.526 |
| -7166 | 9116 | 540 | -7140 | 9130 | 0.898 |
| -7165 | 9115 | 808 | -7139 | 9129 | 0.61  |
| -7164 | 9114 | 732 | -7138 | 9128 | 1     |
| -7163 | 9113 | 924 | -7137 | 9127 | 1.308 |
| -7162 | 9112 | 338 | -7136 | 9126 | 0.85  |
| -7161 | 9111 | 446 | -7135 | 9125 | 0.346 |
| -7160 | 9110 | 884 | -7134 | 9124 | 0.448 |
|       |      |     | -7133 | 9123 | 0.658 |
|       |      |     | -7132 | 9122 | 0.92  |
|       |      |     | -7131 | 9121 | 1.118 |
|       |      |     | -7130 | 9120 | 1.48  |
|       |      |     | -7129 | 9119 | 0.894 |
|       |      |     | -7128 | 9118 | 0.49  |
|       |      |     | -7127 | 9117 | 0.738 |
|       |      |     | -7126 | 9116 | 0.78  |
|       |      |     | -7125 | 9115 | 0.884 |
|       |      |     | -7124 | 9114 | 0.974 |
|       |      |     | -7123 | 9113 | 1.018 |
|       |      |     | -7122 | 9112 | 0.484 |
|       |      |     | -7121 | 9111 | 0.572 |
|       |      |     | -7120 | 9110 | 0.482 |
|       |      |     | -7119 | 9109 | 0.45  |
|       |      |     | -7118 | 9108 | 0.402 |
|       |      |     | -7117 | 9107 | 0.602 |
|       |      |     | -7116 | 9106 | 0.336 |
|       |      |     | -7115 | 9105 | 0.58  |
|       |      |     | -7114 | 9104 | 0.818 |

|       |      |       |
|-------|------|-------|
| -7113 | 9103 | 0.688 |
| -7112 | 9102 | 0.632 |
| -7111 | 9101 | 0.722 |
| -7110 | 9100 | 0.762 |

The sub-samples were cut to be c. 5 mm thick relative to the transverse section. The upper and lower surface were lightly sanded, preserving original pin-holes, but removing any surface contamination and excess resins which come up to the sample surface over time. The upper, lower and radial surfaces were clearly marked with the pin-holes and measurements re-checked prior to dissection. Dissection was carried out using the two versions of the floating astronomical calendar (AD/BC with 0) scale and carried out at times 20 magnification using a binocular microscope and steel dissecting blade. The same blade was used to remove any residual contamination possibilities (pinholes, any residual cells from the previously dissected year of interest) prior to sampling each separate year of interest. Samples were dissected working from youngest to oldest and packed in pre-marked foil packets.

For both time periods covered by this study, the tree-rings were very narrow and the wood highly resinous making dissection a challenge.

#### *Siberian Larch*

Tree rings for radiocarbon analysis of Siberian Larch (*Larix sibirica* Ledeb.) were taken from the sample L4756. This sample was collected on 14 August 2019 from a subfossil stem buried in the alluvial deposits of the Tanlova River (Fig. S1.5) in the southern part of the Yamal Peninsula, which is located in the continuous permafrost zone. Most of subfossil wood found in the area grew near the recent polar tree line. Sample L4756 was found 15 km north of the northernmost currently growing trees. The coordinates of the finding location are 67.75 N 70.06 E, 30 m above sea level.

The sample L4756 contained 302 annual rings, which were dated using a 8768 years long Yamal master chronology (Hantemirov et al., 2021) (Fig. S1.6). [Hantemirov R., Shiyatov S., Gorlanova L., Kukarskih V., Surkov A., Hamzin I., Fonti P., Wacker L. A 8768 years long Yamal tree-ring chronology as a tool for palaeoecological reconstructions // *Russian Journal of Ecology*. 2021. Is. 5. (in press) doi: 10.31857/S0367059721050085]

Sample L4756, like all the others subfossil samples collected in Yamal, is archived at the Institute of Plant and Animal Ecology, Ural Branch of the Russian Academy of Sciences, Ekaterinburg, Russia.

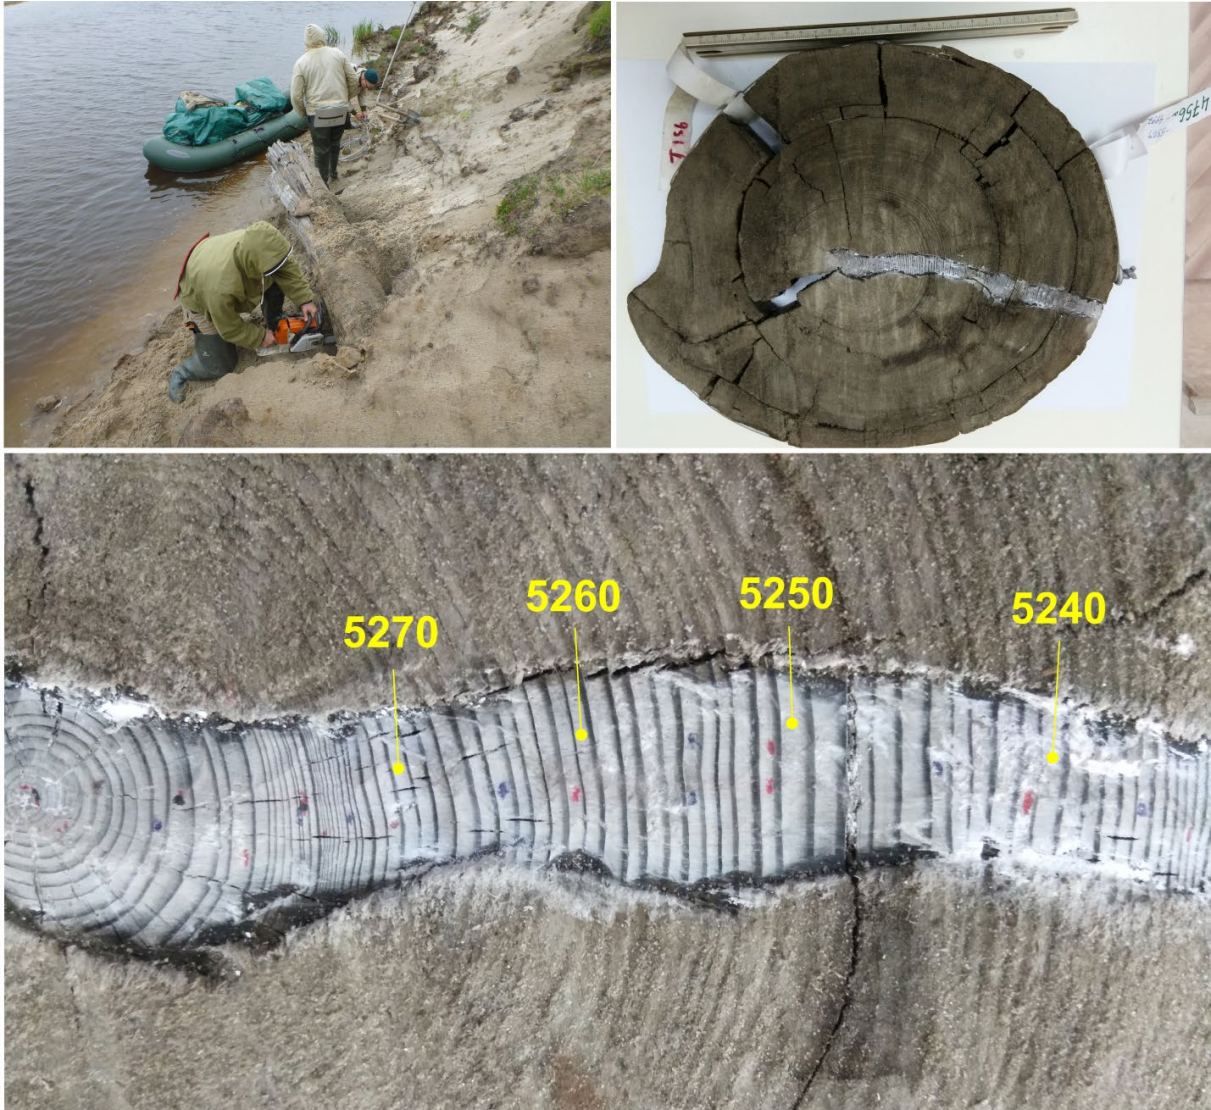

Figure S1.5. Siberian larch used in this work: a) collecting a sample L4756 (Photo by P.Fonti); b) sample L4756; c) tree rings used for analysis (5272-5247 BCE).



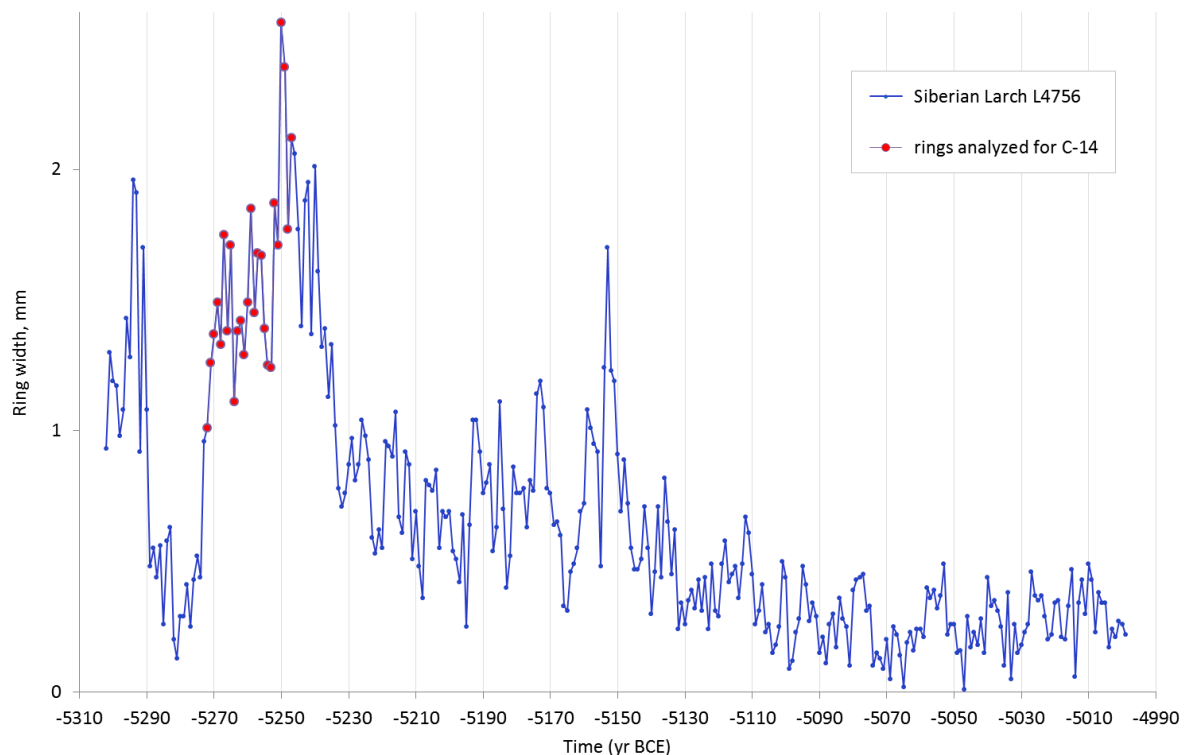

Figure S1.6. Ring width measurements of sample L4756

#### *Dendrochronological dating of two larch samples from the Swiss Alps (ua-1601, tsc-182)*

Two larch (*Larix decidua* Mill.) specimens sampled at Alpine glacier forefields were selected for the yearly resolved  $^{14}\text{C}$  analyses. The main selection criterion was comparatively wide tree rings.

##### *tsc-182 Alpine Larch*

Specimen tsc-182 was collected from a larch log which was uncovered by the retreating Tschierva glacier (46°23' N, 9°52' E), Switzerland, and subsequently displaced by the glacier creek. Field work for sampling was carried out on 15.9.2007. On the specimen tsc-182, 12 (partial) radii were measured with a resolution of 1/1000 mm and subsequently averaged into a 431-year tree-ring width series. The last 54 rings of this series are slightly compressed due to the former covering by the glacier. According to the crossdating (Tab. S1.7) to the Eastern Alpine Conifer Chronology<sup>16</sup> (Fig. S1.7) the 431-year long series (Tab. S1.8) yielded the calendar dating 5337 – 4907 BCE (historical timescale, without year 0).

##### *ua-1601 Alpine Larch*

This larch specimen comes from a detrital log found on the forefield of the Unteraar glacier (46°34' N, 8°12' E), Switzerland. The log was sampled in 2016. Four (partial) radii were measured on the specimen with a resolution of 1/1000 mm and subsequently averaged to a 119-year tree-ring width series. The outermost 18 rings of specimen ua-1601 are slightly compressed. This series was crossdated (for statistics see Tab. S1.7) to the Eastern Alpine Conifer Chronology<sup>16,17</sup> (Fig. S1.7) and returned the calendar dates 7242 – 7124 BCE (Tab. S1.8) (historical timescale, without year 0).

Both specimens are stored in the tree-ring sample archive at the Department of Geography, Universität Innsbruck, Austria. The dissection of the wood samples into single tree-rings for the yearly resolved  $^{14}\text{C}$  measurements was carried out under a microscope using razor blades.

**Table S1.7** Crossdating statistics for the comparison of the two Alpine larch series tsc-182 and ua-1601 with the Eastern Alpine Conifer Chronology (EACC, Nicolussi et al. 2009, 2015). Calculations were carried out by using the program WinTSAP. Overlap: no. of years; Glk.: Gleichläufigkeit; Sign. Glk.: pointer interval Gleichläufigkeit; t-value<sub>BP</sub> and t-value<sub>H</sub>: t-values after Baillie and Pilcher as well as Hollstein; dating: historical timescale, without year 0.

| Sample  | Reference chronology | Overlap [n] | Glk. [%] | Sign. Glk. [%] | t-value <sub>BP</sub> | t-value <sub>H</sub> | Dating [year BCE] |
|---------|----------------------|-------------|----------|----------------|-----------------------|----------------------|-------------------|
| tsc-182 | EACC                 | 431         | 63       | 66             | 7.5                   | 7.4                  | 5337 - 4907       |
| ua-1601 | EACC                 | 119         | 73       | 76             | 5.8                   | 7.0                  | 7242 - 7124       |

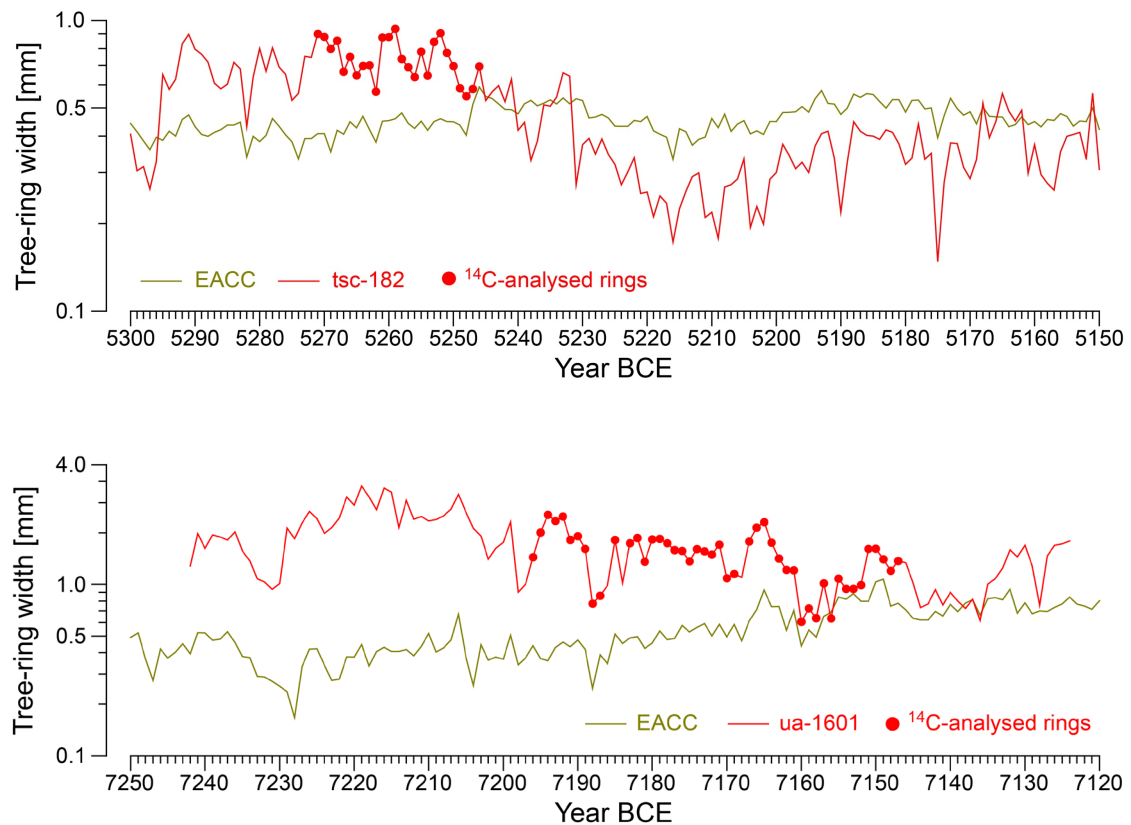

**Figure S1.7** Comparison of the tree-ring width series of the Alpine larch specimens' tsc-182 (upper) and ua-1601 (lower) with the Eastern Alpine Conifer Chronology. The series are given on a logarithmic scale, the tree rings used for single-year <sup>14</sup>C analyses are indicated. For ua-1601, a 150-year long section of the series around the <sup>14</sup>C-analysed samples is shown.

**Tab. S1.8** Tree-ring width series of the two Alpine larch specimen tsc-182 and ua-1601 which provided single-ring samples for radiocarbon analyses (used format: Heidelberg).

HEADER:

KeyCode=tsc-182

Location=Tschierva glacier

Species=Larix decidua

DataFormat=Tree

SeriesType=Mean curve

Unit=1/1000 mm

Pith=P

WaldKante=---  
Length=431  
DateBegin=-5337  
DateEnd=-4907  
Dated=Dated  
DATA:Single

|     |     |     |     |     |     |     |     |     |     |
|-----|-----|-----|-----|-----|-----|-----|-----|-----|-----|
| 86  | 160 | 92  | 71  | 71  | 81  | 48  | 98  | 60  | 61  |
| 35  | 48  | 40  | 36  | 39  | 80  | 101 | 65  | 53  | 84  |
| 133 | 132 | 224 | 172 | 214 | 237 | 152 | 151 | 134 | 164 |
| 213 | 214 | 257 | 170 | 156 | 285 | 374 | 406 | 304 | 314 |
| 263 | 327 | 651 | 579 | 628 | 830 | 895 | 796 | 765 | 719 |
| 608 | 582 | 604 | 717 | 681 | 431 | 639 | 800 | 669 | 805 |
| 691 | 653 | 531 | 561 | 753 | 746 | 899 | 877 | 799 | 852 |
| 666 | 750 | 647 | 698 | 701 | 569 | 874 | 876 | 936 | 737 |
| 690 | 639 | 781 | 646 | 844 | 904 | 774 | 697 | 585 | 549 |
| 581 | 695 | 530 | 568 | 597 | 525 | 628 | 419 | 446 | 330 |
| 384 | 512 | 507 | 545 | 661 | 643 | 272 | 374 | 393 | 347 |
| 391 | 346 | 320 | 272 | 301 | 337 | 254 | 257 | 211 | 249 |
| 235 | 173 | 225 | 258 | 290 | 299 | 210 | 219 | 178 | 267 |
| 272 | 285 | 334 | 194 | 229 | 199 | 284 | 300 | 375 | 343 |
| 309 | 325 | 300 | 370 | 408 | 416 | 335 | 219 | 325 | 448 |
| 416 | 402 | 400 | 390 | 420 | 412 | 376 | 320 | 336 | 440 |
| 333 | 349 | 148 | 277 | 379 | 377 | 312 | 286 | 332 | 519 |
| 395 | 448 | 560 | 487 | 451 | 491 | 298 | 374 | 295 | 275 |
| 261 | 353 | 399 | 405 | 412 | 334 | 562 | 307 | 326 | 417 |
| 456 | 536 | 428 | 330 | 269 | 128 | 288 | 163 | 215 | 192 |
| 194 | 234 | 245 | 262 | 330 | 283 | 217 | 250 | 307 | 310 |
| 282 | 254 | 341 | 547 | 353 | 547 | 427 | 291 | 218 | 252 |
| 327 | 332 | 381 | 367 | 409 | 252 | 301 | 397 | 356 | 339 |
| 274 | 326 | 474 | 382 | 450 | 389 | 551 | 469 | 363 | 372 |
| 396 | 304 | 240 | 261 | 226 | 180 | 219 | 259 | 241 | 283 |
| 223 | 274 | 212 | 363 | 274 | 324 | 285 | 299 | 266 | 218 |
| 202 | 283 | 329 | 347 | 431 | 368 | 353 | 376 | 494 | 493 |
| 398 | 321 | 368 | 313 | 317 | 358 | 388 | 464 | 402 | 367 |
| 392 | 367 | 322 | 260 | 227 | 231 | 199 | 186 | 178 | 189 |
| 165 | 196 | 264 | 326 | 360 | 359 | 430 | 529 | 690 | 419 |
| 291 | 309 | 484 | 559 | 373 | 411 | 420 | 520 | 401 | 492 |
| 458 | 559 | 556 | 636 | 508 | 459 | 380 | 419 | 577 | 384 |
| 298 | 420 | 591 | 367 | 401 | 330 | 339 | 273 | 257 | 322 |
| 272 | 320 | 503 | 482 | 284 | 358 | 288 | 244 | 285 | 281 |
| 269 | 143 | 142 | 320 | 306 | 227 | 190 | 168 | 124 | 89  |
| 155 | 199 | 202 | 313 | 247 | 299 | 313 | 345 | 364 | 390 |
| 358 | 344 | 379 | 348 | 377 | 221 | 176 | 332 | 291 | 308 |
| 306 | 376 | 479 | 402 | 278 | 304 | 228 | 248 | 197 | 240 |
| 273 | 334 | 264 | 188 | 222 | 164 | 236 | 227 | 231 | 219 |
| 262 | 276 | 280 | 240 | 253 | 311 | 321 | 238 | 301 | 269 |
| 265 | 269 | 251 | 231 | 237 | 262 | 262 | 269 | 286 | 366 |
| 294 | 278 | 264 | 221 | 271 | 242 | 215 | 120 | 160 | 179 |
| 178 | 229 | 159 | 112 | 190 | 156 | 188 | 194 | 156 | 140 |
| 151 |     |     |     |     |     |     |     |     |     |

HEADER:  
KeyCode=ua-1601

Location=Unteraar glacier  
Species=Larix decidua  
DataFormat=Tree  
SeriesType=Mean curve  
Unit=1/1000 mm  
Pith=-  
WaldKante=---  
Length=119  
DateBegin=-7242  
DateEnd=-7124  
Dated=Dated  
DATA:Single

1281 1979 1623 1946 1894 1815 2029 1571 1373 1079  
1032 938 1011 2134 1850 2278 2672 2420 1986 2152  
2443 3239 2903 3754 3251 2733 3659 3457 2152 3090  
2403 2494 2351 2393 2515 2750 3355 2643 2126 1916  
1404 1625 1761 2313 902 1003 1443 2011 2553 2345  
2493 1821 1913 1614 773 861 986 1817 1018 1741  
1868 1358 1831 1848 1740 1587 1569 1364 1610 1560  
1495 1708 1087 1152 1101 1782 2145 2309 1754 1418  
1216 1210 606 725 636 1016 633 1081 943 943  
991 1613 1619 1403 1200 1372 1337 1022 732 770  
931 758 899 800 725 819 615 1004 1074 1246  
1595 1449 1692 1277 754 1469 1692 1726 1796

- 1 Friedrich, M. *et al.* The 12,460-year Hohenheim oak and pine tree-ring chronology from central Europe - A unique annual record for radiocarbon calibration and paleoenvironment reconstructions. *Radiocarbon* **46**, 1111-1122 (2004).
- 2 Spurk, M. *et al.* Revisions and Extension of the Hohenheim Oak and Pine Chronologies: New Evidence About the Timing of the Younger Dryas/Preboreal Transition. *Radiocarbon* **40**, 1107-1116, doi:10.1017/S0033822200019159 (1998).
- 3 Achterberg, I., Frechen, M., Bauerochse, A., Eckstein, J. & Leuschner, H. The Göttingen tree-ring chronologies of peat-preserved oaks and pines from Northwest Germany. *Zeitschrift der Deutschen Gesellschaft für Geowissenschaften* **168**, doi:10.1127/zdgg/2016/0042 (2016).
- 4 Baillie, M. G. L. *Tree-ring dating and archaeology*. (London : Croom Helm, 1982).
- 5 Munro, M. A. R. An Improved Algorithm for Crossdating Tree-Ring Series. (1984).
- 6 Ferguson, C. W. A 7104-Year Annual Tree-Ring Chronology for Bristlecone Pine, *Pinus Aristata*, from the White Mountains, California. *Tree-ring Bulletin* (1969).
- 7 Stokes, M. A. & Smiley, T. L. *An Introduction to Tree-ring Dating*. (University of Arizona Press, 1996).
- 8 Holmes, R. Computer-Assisted Quality Control in Tree-Ring Dating and Measurement. *Tree-ring Bulletin* (1983).
- 9 LaMarche Jr., V. C. & Harlan, T. P. Accuracy of tree ring dating of bristlecone pine for calibration of the radiocarbon time scale. *Journal of Geophysical Research (1896-1977)* **78**, 8849-8858, doi:10.1029/JC078i036p08849 (1973).
- 10 Salzer, M. W. & Hughes, M. K. Bristlecone pine tree rings and volcanic eruptions over the last 5000 yr. *Quaternary Res* **67**, 57-68, doi:10.1016/j.yqres.2006.07.004 (2007).

- 11 Salzer, M. W. & Hughes, M. K. in *Advances in Global Change Research Advances in Global Change Research* 469-482 (Springer International Publishing, 2010).
- 12 Salzer, M., Hughes, M., Bunn, A. & Kipfmueller, K. Recent unprecedented tree-ring growth in bristlecone pine at the highest elevations and possible causes. *Proceedings of the National Academy of Sciences of the United States of America* **106**, 20348-20353, doi:10.1073/pnas.0903029106 (2009).
- 13 Salzer, M. W., Bunn, A. G., Graham, N. E. & Hughes, M. K. Five millennia of paleotemperature from tree-rings in the Great Basin, USA. *Climate Dynamics* **42**, 1517-1526, doi:10.1007/s00382-013-1911-9 (2014).
- 14 Kipfmueller, K. F. & Salzer, M. W. Linear trend and climate response of five-needle pines in the western United States related to treeline proximity. *Canadian Journal of Forest Research* **40**, 134-142, doi:10.1139/X09-187 (2010).
- 15 Salzer, M. W., Pearson, C. L. & Baisan, C. H. Dating the Methuselah Walk Bristlecone Pine Floating Chronologies. *Tree-Ring Research* **75**, 61-66, doi:10.3959/1536-1098-75.1.61 (2019).
- 16 Nicolussi, K. *et al.* A 9111 year long conifer tree-ring chronology for the European Alps: a base for environmental and climatic investigations. *The Holocene* **19**, 909-920, doi:10.1177/0959683609336565 (2009).
- 17 Nicolussi, K., Weber, G., Patzelt, G. & Thurner, A. A question of time: extension of the Eastern Alpine Conifer Chronology back to 10071 b2k. *GFZ Potsdam, Scientific Technical Report STR15, Potsdam*, 69-73 (2015).
