# Supplementary material for: Tree rings reveal two strong solar proton events in 7176 and 5259 BCE
Source: Research Square preprint supplement (doi:10.21203/rs.3.rs-753272/v1), 2021-08-10
Supplement: Supplementary file 1 [file cb5879b8fc14cb560af55928.xlsx]

## Sheet: (a)
IntCal year (BCE)	IntCal d14C (‰)	IntCal d14C_sig (‰)	Alpine Larch time (yr cal BP)	Alpine Larch time (BCE)	Alpine Larch d14C (‰)	Alpine Larch d14C_sig (‰)	German Oak time (yr cal BP)	German Oak time (BCE)	German Oak d14C (‰)	German Oak d14C_sig (‰)	Bristlecone Pine (USA) time (yr cal BP)	Bristlecone Pine (USA) time (BCE)	Bristlecone Pine (USA) d14C (‰)	Bristlecone Pine (USA) d14C_sig (‰)
7236	93	3.4	9096	7147	82.9086	2.94648	9125	7176	96.436	0.988864	9099	7150	84.332	2.46673
7231	90.9	3.2	9097	7148	75.9099	2.93508	9126	7177	82.565	0.746086	9100	7151	87.4081	2.53251
7226	88.4	3.3	9098	7149	83.9504	2.87776	9127	7178	81.6291	0.864162	9101	7152	84.9515	2.52839
7221	85.9	3.5	9099	7150	84.1868	2.89813	9128	7179	80.1087	1.67458	9102	7153	84.4973	2.52019
7216	84	3.4	9100	7151	78.5918	2.87353	9129	7180	80.1007	1.3938	9103	7154	85.4808	2.51904
7211	82.9	3.3	9101	7152	78.6488	2.9089	9130	7181	80.8259	1.68937	9104	7155	85.4676	2.47218
7206	82.5	3.4	9102	7153	81.9779	2.8842	9131	7182	80.7852	1.3994	9105	7156	88.6278	2.48764
7201	82.8	3.2	9103	7154	83.6749	2.8731	9132	7183	81.6779	1.69365	9106	7157	80.7866	2.45999
7196	83.7	2.8	9104	7155	80.9046	2.89046	9133	7184	79.5916	1.40317	9107	7158	81.2628	2.46721
7191	84.7	2.9	9105	7156	83.5979	2.8726	9134	7185	84.1815	1.68043	9108	7159	86.107	2.48243
7186	85.5	2.8	9106	7157	83.3069	2.86438	9135	7186	80.2691	1.4057	9109	7160	82.9673	2.49438
7181	86.6	2.8	9107	7158	80.8527	2.88949	9136	7187	79.882	1.67686	9110	7161	83.6179	2.50268
7176	88.2	2.8	9108	7159	83.407	2.88075	9137	7188	81.7523	1.38956	9111	7162	81.7464	2.48117
7171	89.5	2.9	9109	7160	86.9707	2.84705	9138	7189	83.9798	2.29024	9112	7163	87.4806	2.53942
7166	89.2	2.8	9110	7161	83.4573	2.91018	9139	7190	82.1574	1.69132	9113	7164	87.7387	2.54018
7161	87.9	2.8	9111	7162	85.9043	2.88167	9140	7191	81.4156	1.65104	9114	7165	89.4615	2.46685
7156	86.5	2.8	9112	7163	89.9366	2.87942	9141	7192	79.3688	1.71089	9115	7166	90.7111	2.52409
7151	85.4	2.9	9113	7164	87.6009	2.86708	9142	7193	80.2846	2.28603	9117	7168	90.2899	2.49647
7146	85	2.9	9114	7165	85.2336	2.88027	9143	7194	82.772	1.68927	9118	7169	87.6968	2.49449
7141	85.5	3	9115	7166	89.9436	2.90528	9144	7195	81.2596	2.28551	9119	7170	93.4406	1.90276
7136	86.7	2.9	9116	7167	91.9832	2.06544	9145	7196	83.4539	1.69183	9120	7171	93.3073	1.51401
7131	87.7	3.1	9118	7169	94.1344	2.0825	9146	7197	86.069	2.29247	9121	7172	92.4513	1.51682
7126	87.7	3	9119	7170	90.7388	2.92121	9147	7198	87.3261	1.69165	9122	7173	97.3395	1.54276
7121	87	2.9	9120	7171	99.9013	1.94257	9148	7199	87.4496	2.26668	9123	7174	100.469	1.5201
7116	86	2.8	9121	7172	99.612	2.43948	9149	7200	83.0068	1.81351	9124	7175	96.5502	1.76643
7111	84.9	2.8	9122	7173	93.78	1.96591	9150	7201	84.5077	1.79149	9125	7176	95.9463	2.4951
7106	82.9	3.1	9123	7174	97.0479	2.67212	9151	7202	83.9161	1.80414	9126	7177	85.0114	1.51804
7101	80.3	3	9124	7175	99.5966	1.96633	9152	7203	84.2155	1.80891	9127	7178	83.7403	2.4623
7096	77.9	3	9125	7176	101.835	1.98109	9153	7204	82.112	1.80051	9128	7179	80.5378	2.43657
7091	76.7	2.8	9126	7177	81.926	2.626	9154	7205	83.0787	1.79859	9129	7180	83.418	2.47355
7086	77	2.7	9127	7178	81.0813	2.63013	9155	7206	84.752	1.79428	9130	7181	78.5889	2.59459
7081	78.8	2.7	9128	7179	82.1179	2.58328	9156	7207	84.4589	1.79284	9132	7183	85.8295	2.53864
7076	81.3	2.6	9129	7180	78.779	2.63973	9157	7208	86.3283	1.77199	9133	7184	85.8189	2.49187
			9130	7181	79.518	2.65807	9158	7209	84.2831	1.77411	9134	7185	84.4168	1.91861
			9131	7182	82.326	2.63191	9159	7210	85.7114	1.75729	9135	7186	81.0171	2.46974
			9132	7183	89.6531	2.65196	9160	7211	87.0761	1.7797	9136	7187	86.6736	2.54114
			9134	7185	83.5902	2.61039	9161	7212	86.2895	1.79788	9137	7188	80.7007	2.4701
			9136	7187	83.4845	2.8238	9162	7213	88.4459	1.82675	9138	7189	83.0993	2.51799
			9137	7188	82.1134	2.62104	9163	7214	89.1032	1.79663	9143	7194	82.8276	2.54027
			9138	7189	87.0374	2.65678	9164	7215	88.7233	1.80275	9144	7195	84.9563	2.46402
			9139	7190	83.825	2.61764	9165	7216	91.1462	1.81288	9145	7196	85.5983	2.53131
			9140	7191	84.4162	2.6166	9166	7217	88.4137	1.82321	9146	7197	86.7125	2.50349
			9141	7192	84.7212	2.6798	9167	7218	90.99	1.79624	9147	7198	84.9176	2.55553
			9142	7193	81.0835	2.63912	9168	7219	92.464	1.81398	9148	7199	86.7366	2.48976
			9143	7194	79.6712	2.61777	9169	7220	94.3342	1.78478	9149	7200	82.7042	2.642
			9144	7195	85.0932	2.65701	9040	7091	79.9211	2.66681
			9145	7196	88.0236	2.70392	9041	7092	80.7645	2.58322
							9042	7093	76.68	2.60652
							9043	7094	80.8667	2.60183
							9044	7095	78.1867	2.5801
							9045	7096	81.3246	2.60377
							9046	7097	80.5779	2.59724
							9047	7098	80.9597	2.58109
							9048	7099	81.5363	2.57367
							9049	7100	81.5561	2.58826
							9050	7101	83.4506	2.58103
							9052	7103	84.3378	2.61822
							9053	7104	84.3331	2.47868
							9054	7105	90.6486	2.61698
							9055	7106	80.7646	2.6222
							9072	7123	86.0825	1.92674
							9073	7124	87.2877	1.91985
							9074	7125	86.9241	1.91983
							9075	7126	84.374	1.9221
							9076	7127	86.1769	1.94069
							9077	7128	84.7736	1.92432
							9078	7129	84.8703	1.92345
							9079	7130	86.7945	1.9223
							9080	7131	88.9912	1.92673
							9081	7132	86.7634	1.92485
							9082	7133	87.344	1.92705
							9083	7134	86.3783	1.93219
							9084	7135	86.2478	1.92449
							9085	7136	87.0216	1.92054
							9086	7137	86.2739	1.93052
							9087	7138	84.21	1.92923
							9088	7139	86.8634	1.92797
							9090	7141	84.7577	1.92411
							9091	7142	85.6506	1.92561
							9092	7143	83.2679	1.9259
							9093	7144	86.8133	1.93482
							9094	7145	86.5593	1.92164
							9095	7146	83.859	1.91686
							9096	7147	83.1732	1.92051
							9097	7148	88.5494	1.93752
							9099	7150	84.9892	2.39397
							9101	7152	86.177	2.39254
							9102	7153	86.602	2.39516
							9103	7154	87.1123	2.40484
							9104	7155	88.2132	2.39589
							9105	7156	84.9619	2.4612
							9106	7157	85.6617	2.39432
							9107	7158	84.105	2.39157
							9108	7159	83.4781	2.40155
							9109	7160	88.572	1.41801
							9110	7161	85.3412	1.71099
							9111	7162	85.0485	1.42379
							9112	7163	88.3164	1.71629
							9113	7164	86.5985	1.4222
							9114	7165	86.9459	1.70957
							9115	7166	87.6942	1.22319
							9116	7167	89.9614	1.7152
							9117	7168	92.5401	1.23539
							9118	7169	91.8022	1.39565
							9119	7170	91.814	1.22916
							9120	7171	92.7728	1.39412
							9121	7172	95.5137	1.22439
							9122	7173	97.3979	1.40978
							9123	7174	99.6329	1.21299
							9124	7175	101.928	1.00406

## Sheet: (b)
IntCal year (BCE)	IntCal d14C (‰)	IntCal d14C_sig (‰)	Irish Oak time (yr cal BP)	Irish Oak time (BCE)	Irish Oak d14C (‰)	Irish Oak d14C_sig (‰)	Bristlecone Pine (USA) time (yr cal BP)	Bristlecone Pine (USA) time (BCE)	Bristlecone Pine (USA) d14C (‰)	Bristlecone Pine (USA) d14C_sig (‰)	Alpine Larch time (yr cal BP)	Alpine Larch time (BCE)	Alpine Larch d14C (‰)	Alpine Larch d14C_sig (‰)	Sibirian Larch time (yr cal BP)	Sibirian Larch time (BCE)	Sibirian Larch d14C (‰)	Sibirian Larch d14C_sig (‰)
5316	92.6	2.6	7209	5260	92.0687	2.63091	7200	5251	99.6004	1.87428	7195	5246	98.9449	2.2561	7196	5247	96.6158	1.77043
5311	94.2	2.5	7177	5228	92.3764	2.62075	7201	5252	99.4203	1.52689	7196	5247	99.9037	1.86024	7197	5248	96.3911	1.77203
5306	96.2	2.4	7170	5221	98.8313	2.85658	7202	5253	102.535	1.53724	7197	5248	97.6833	2.26365	7198	5249	97.4648	1.76316
5301	98.1	2.5	7167	5218	93.6734	2.61758	7203	5254	104.374	1.88371	7198	5249	94.2797	1.85358	7199	5250	97.716	1.75949
5296	99.6	2.7	7163	5214	85.0576	2.61632	7204	5255	105.977	1.51437	7199	5250	98.7712	2.26058	7200	5251	98.4834	1.75911
5291	100.5	2.6	7145	5196	103.583	2.61063	7205	5256	108.507	1.54695	7200	5251	102.078	1.85213	7201	5252	102.863	1.76356
5286	100.8	2.4	7126	5177	99.1549	2.60463	7206	5257	110.399	1.87434	7201	5252	105.309	2.26759	7202	5253	104.716	1.79798
5281	100.6	2.5	7125	5176	100.916	2.60432	7207	5258	109.448	1.54677	7202	5253	107.714	1.88357	7203	5254	104.744	1.78184
5276	99.8	2.8	7124	5175	93.9651	2.39095	7208	5259	110.309	1.53503	7203	5254	108.953	2.2687	7204	5255	107.025	1.8262
5271	98.5	2.9	7127	5178	97.6301	2.43918	7209	5260	104.145	1.54535	7204	5255	108.826	1.85838	7205	5256	112.177	1.78645
5266	96.9	2.9	7128	5179	98.9234	2.29737	7210	5261	91.1222	1.87498	7205	5256	111.138	2.28426	7206	5257	111.241	1.78576
5261	94.9	3	7129	5180	103.462	2.08446	7211	5262	96.3515	1.87018	7206	5257	110.86	1.85888	7207	5258	113.438	1.78945
5256	92.9	3.1	7132	5183	102.251	2.13261	7212	5263	96.5967	1.31583	7207	5258	113.99	2.31946	7208	5259	110.725	1.82646
5251	90.9	3.4	7137	5188	105.432	2.1339	7213	5264	96.4509	1.81632	7208	5259	113.752	1.94406	7209	5260	91.6849	1.78391
5246	89.1	3.6	7139	5190	105.082	2.39529	7214	5265	95.5697	1.80701	7209	5260	95.0085	2.29145	7210	5261	94.4182	1.76754
5241	87.6	3.6	7144	5195	98.0149	2.30182	7215	5266	90.1342	2.66366	7210	5261	95.0077	1.91594	7211	5262	93.0682	1.77829
5236	86.6	3.3	7146	5197	102.244	2.46853	7216	5267	96.8734	2.59037	7211	5262	96.7042	2.25781	7212	5263	95.4739	1.76302
5231	86.2	3	7151	5202	91.1312	2.28002	7217	5268	95.3292	2.59396	7212	5263	92.5284	1.95102	7213	5264	95.8585	1.77471
5226	86.8	2.9	7153	5204	96.8353	2.28057	7218	5269	92.0603	2.5908	7213	5264	96.4544	2.25394	7214	5265	98.2778	1.77265
5221	88.8	3.1	7154	5205	93.5943	2.09078	7219	5270	92.2479	2.53236	7214	5265	93.1189	1.92965	7215	5266	95.1508	1.76683
5216	92.2	2.9	7155	5206	96.8394	2.49498	7220	5271	95.4966	2.57686	7215	5266	97.0015	1.89676	7216	5267	94.6732	1.77373
5211	96.8	2.7	7157	5208	93.5396	2.37674					7216	5267	98.9534	2.26246	7217	5268	95.4984	1.77053
5206	101.4	2.7	7161	5212	90.9538	2.11633					7217	5268	92.8271	1.87444	7218	5269	94.7593	1.76266
5201	104.9	2.9	7162	5213	91.8706	2.40196					7218	5269	97.8323	2.25487	7219	5270	96.4261	2.27399
5196	106.3	2.8	7164	5215	89.1613	2.11709					7219	5270	97.5526	1.85381	7220	5271	99.4751	1.77453
5191	105.4	2.5	7169	5220	90.8676	2.28499					7220	5271	99.1223	2.273	7221	5272	94.7506	2.27881
5186	103.2	2.6	7171	5222	96.2025	2.40458
5181	100.7	2.7	7181	5232	91.1888	2.28831
5176	98.5	2.5	7182	5233	94.6345	2.38394
5171	96.8	2.6	7183	5234	93.2887	2.28886
5166	95.4	2.9	7200	5251	101.13	2.4847
			7229	5280	103.293	1.77162
			7249	5300	100.116	1.64592
			7248	5299	96.7428	2.10111
			7247	5298	97.4699	1.55532
			7246	5297	102.805	1.68217
			7245	5296	101.214	1.60846
			7244	5295	98.5568	1.22345
			7243	5294	99.3873	1.5918
			7242	5293	101.507	1.68633
			7241	5292	102.766	1.49078
			7240	5291	105.958	1.5018
			7239	5290	102.064	2.06552
			7238	5289	101.57	1.27334
			7237	5288	100.924	1.53407
			7236	5287	104.025	1.55435
			7235	5286	102.77	2.49342
			7234	5285	100.529	1.6447
			7233	5284	102.267	1.73268
			7232	5283	100.749	1.75805
			7231	5282	101.544	2.4889
			7230	5281	104.554	1.64148
			7228	5279	101.999	1.81411
			7227	5278	101.399	1.67493
			7226	5277	97.8975	1.70758
			7225	5276	98.3582	2.44438
			7224	5275	99.5437	1.75713
			7223	5274	99.3168	1.71347
			7222	5273	96.0533	2.427
			7221	5272	99.3446	1.34752
			7220	5271	97.763	1.61522
			7219	5270	95.0725	1.4357
			7218	5269	95.0601	1.38599
			7217	5268	96.5457	1.74363
			7216	5267	93.2431	2.4178
			7215	5266	95.163	1.61131
			7214	5265	94.2557	1.70168
			7213	5264	94.6865	1.78609
			7212	5263	92.1249	1.69095
			7211	5262	91.8341	1.61249
			7210	5261	92.1725	1.67159
			7208	5259	109.783	1.72617
			7207	5258	115.362	1.6559
			7206	5257	109.445	1.64074
			7205	5256	108.67	1.52612
			7204	5255	106.264	2.1965
			7203	5254	108.562	1.53998
			7202	5253	105.332	1.60052
			7201	5252	103.467	2.20516
			7199	5250	97.998	1.63451
			7198	5249	102.266	1.64982
			7197	5248	98.7029	2.18961
			7196	5247	97.4613	1.71074
			7195	5246	97.6266	1.66759
			7194	5245	96.0507	1.52594
			7193	5244	97.1319	1.70861
			7192	5243	97.2672	1.5863
			7191	5242	97.9592	1.62473
			7190	5241	95.2282	1.52373
			7189	5240	96.1927	1.62828
			7188	5239	91.7627	2.42541
			7187	5238	92.6679	1.6856
			7186	5237	93.6969	1.50691
			7184	5235	92.1418	1.61145
			7180	5231	91.303	1.48862
			7179	5230	90.9079	1.60023
			7176	5227	88.5433	1.60435
			7175	5226	93.2651	1.57215
			7174	5225	91.9536	1.62026
			7173	5224	90.7672	1.54933
			7172	5223	91.2769	1.48484
			7166	5217	91.4502	1.64282
			7165	5216	88.1403	1.60599
			7159	5210	93.7961	1.67779
			7156	5207	93.2062	1.73579
			7150	5201	97.9973	1.56851
			7149	5200	97.1358	1.73876
			7148	5199	101.786	1.74476
			7147	5198	99.9349	1.68986
			7143	5194	102.865	1.61384
			7142	5193	103.71	1.73858
			7141	5192	104.983	1.66509
			7140	5191	107.368	1.66436
			7138	5189	105.498	1.68639
			7136	5187	107.093	2.3002
			7135	5186	107.456	1.74629
			7134	5185	105.735	1.65912
			7133	5184	104.563	1.69966
			7131	5182	102.977	1.62257
			7130	5181	101.48	1.6094
