# Supplementary material for: Tree rings reveal two strong solar proton events in 7176 and 5259 BCE
Source: Research Square preprint supplement (doi:10.21203/rs.3.rs-753272/v1), 2021-08-10
Supplement: Supplementary file 2 [file b796ac6b39de72f3c4aef119.pdf]

## Supplementary figures

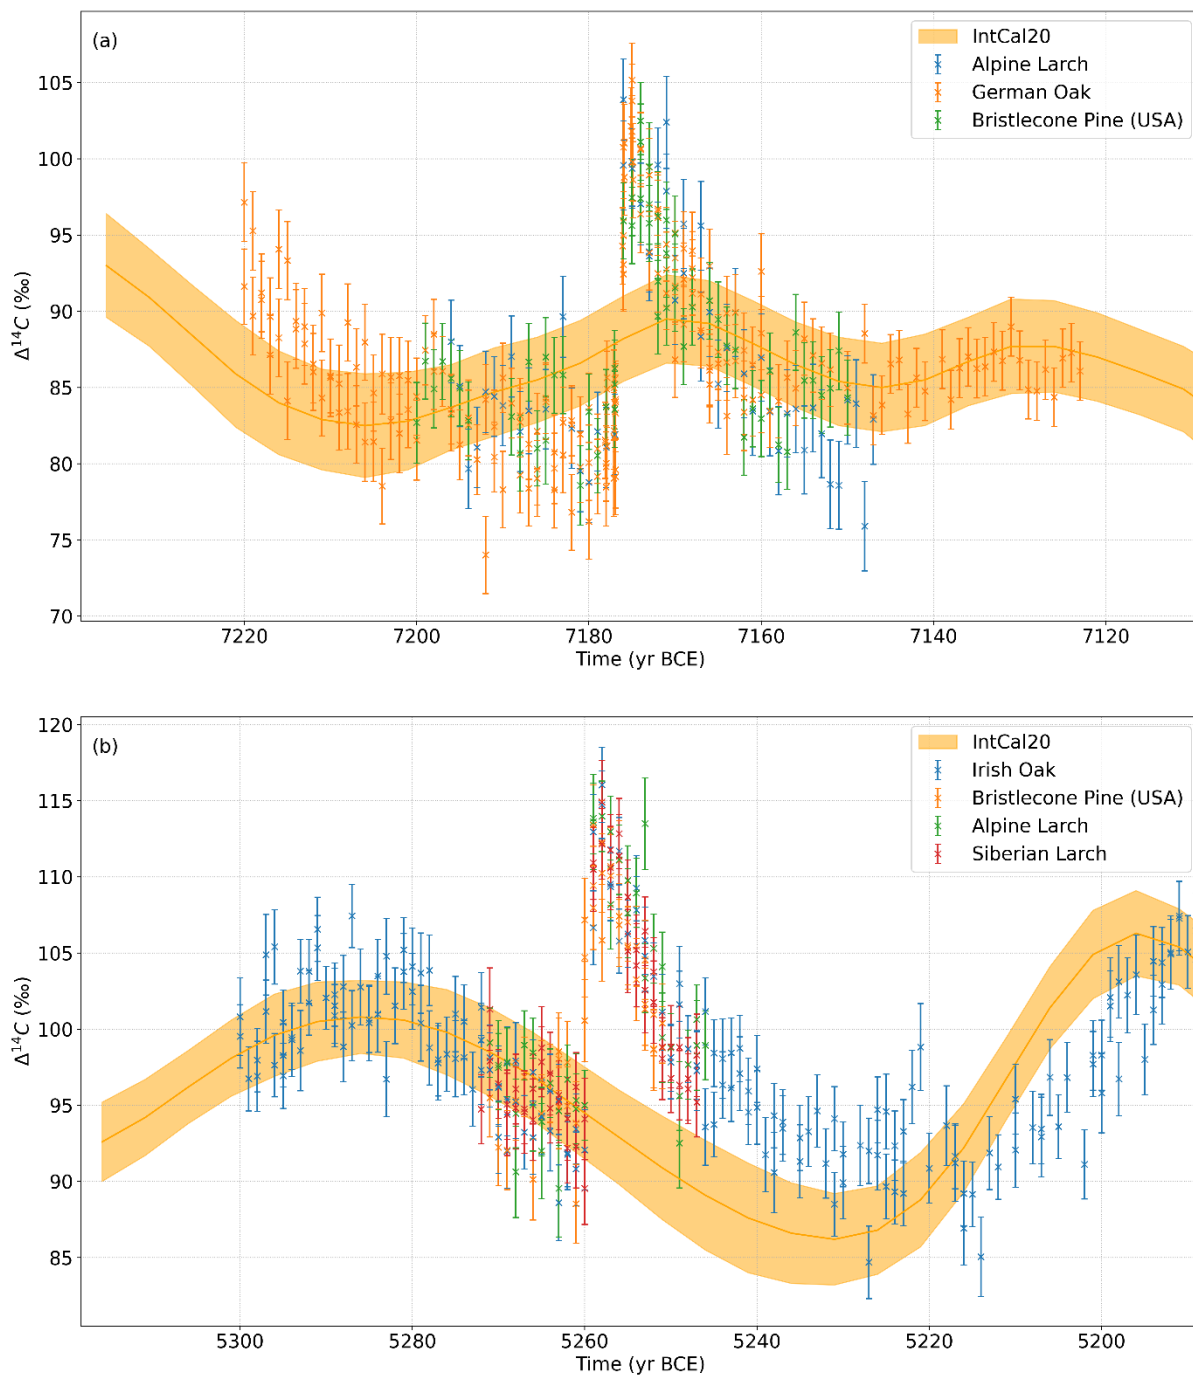

**Supplementary Fig. 1 All Measurement results of the 2 new events.**  $^{14}\text{C}$  measurements with 1- $\sigma$  errors reported as  $\Delta^{14}\text{C}$  of the two newly found events (7176 BCE (a), 5259 BCE (b)) in all different trees compared to the IntCal20 calibration curve<sup>1</sup> (orange band). The Irish Oak was independently repeated by two different labs (ETH-Zurich, Bristol).

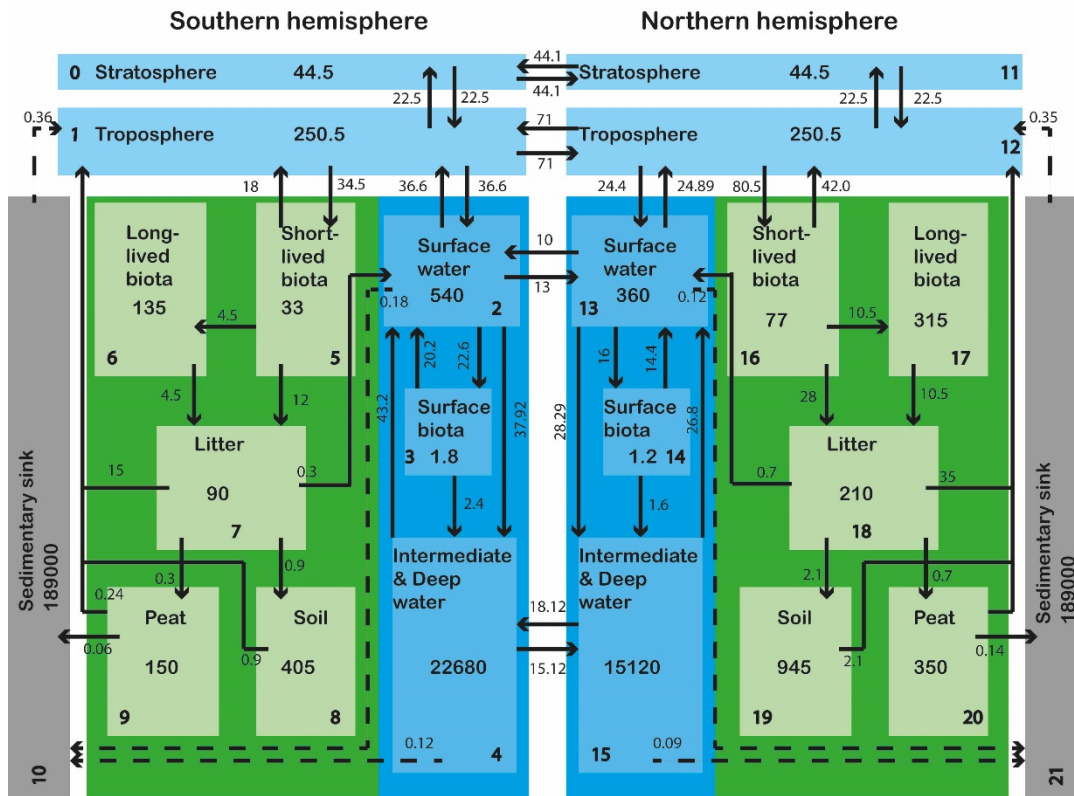

**Supplementary Fig. 2 Carbon box model used to reconstruct  $^{14}\text{C}$  production.** The carbon fluxes between boxes and their carbon contents are given in Gt/yr and Gt.

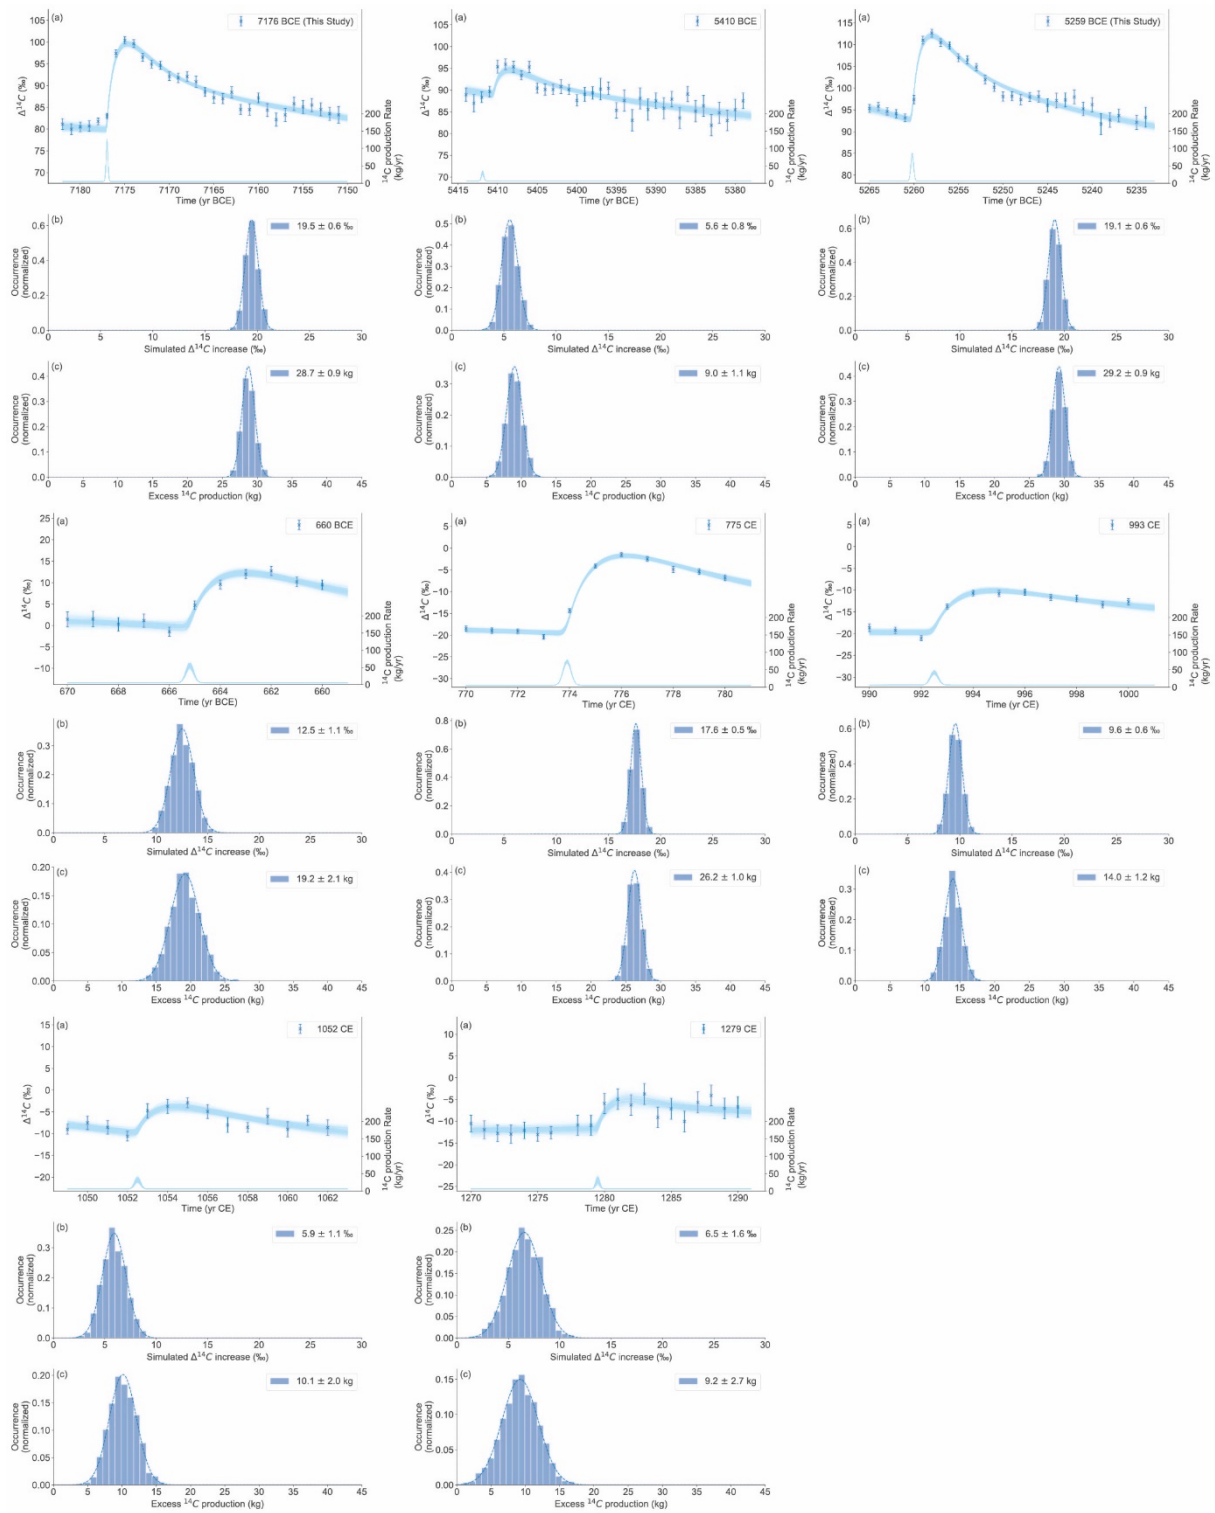

**Supplementary Fig. 3 Evaluation of all known  $^{14}\text{C}$  events.** (a) Mean data of known  $^{14}\text{C}$  events with  $1\text{-}\sigma$  errors and result of 1000 Simulations. The fitted Gaussian shaped production spikes for all simulations are also shown. (b) Distribution of the simulated  $\Delta^{14}\text{C}$  increases (blue bars) with a Gaussian fit (dashed line). (c) Distribution of excess  $^{14}\text{C}$  production (blue bars) with Gaussian fit (dashed line). Data Sources: 5410 BCE: Miyake et al.<sup>2</sup>, 660 BCE: Sakurai et al.<sup>3</sup>, 775 CE and 993 CE: Büntgen et al.<sup>4</sup>, 1052 CE and 1279 CE: Brehm et al.<sup>5</sup>.

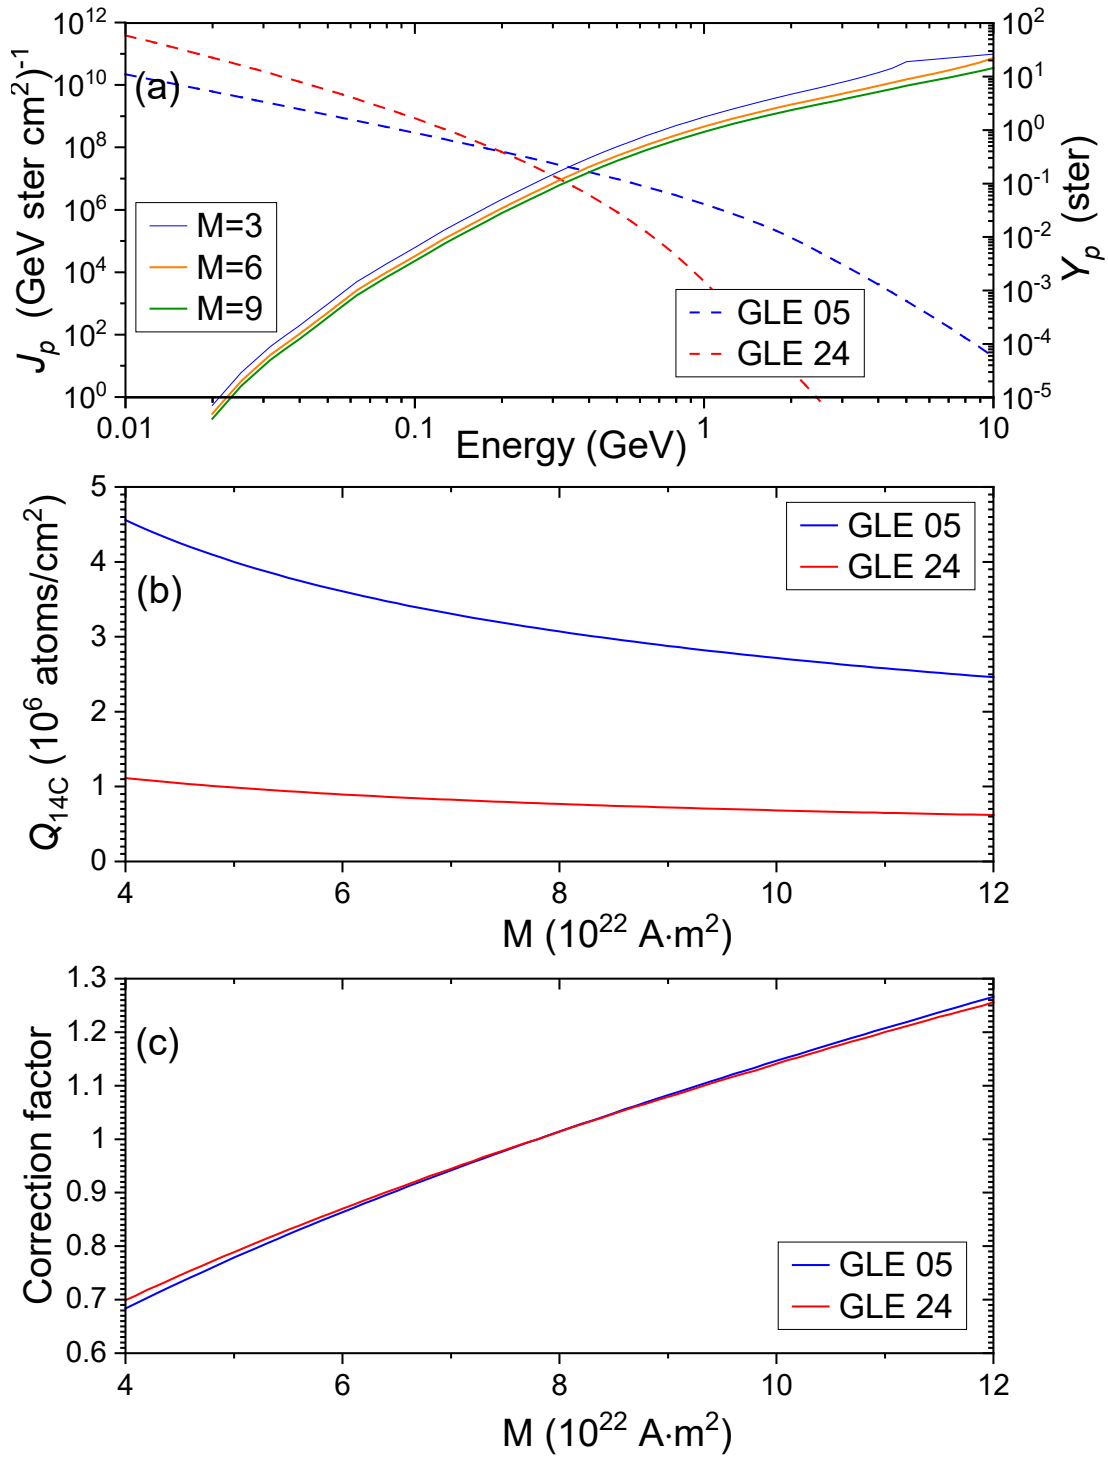

**Supplementary Fig. 4** Production of  $^{14}\text{C}$  by SEP events for different values of VADM: (a) Global yield functions ( $Y_p$ , right-hand-side axis) of  $^{14}\text{C}$  by protons for three values of VADM (3x, 6x and 9x $10^{22}$  A m $^2$  as blue, orange and green solid lines, respectively); as well as spectral omnidirectional fluences ( $J(E)$ , left-hand-side axis) of SEPs for two bounding cases, the softest and hardest-spectrum known events of 23-Feb-1956 (GLE 05, blue dashed line) and 04-Aug-1972 (GLE 24, red dashed line). (b) Calculated globally-averaged  $^{14}\text{C}$  production  $Q_{14\text{C}}$  during the two SEP events as a function of the geomagnetic field VADM. (c) Correction factor  $Q(M_o)/Q(M)$  of the  $^{14}\text{C}$  production at the VADM value of  $M$  to that for a modern geomagnetic field ( $M_o=7.8 \cdot 10^{22}$  A m $^2$ ).

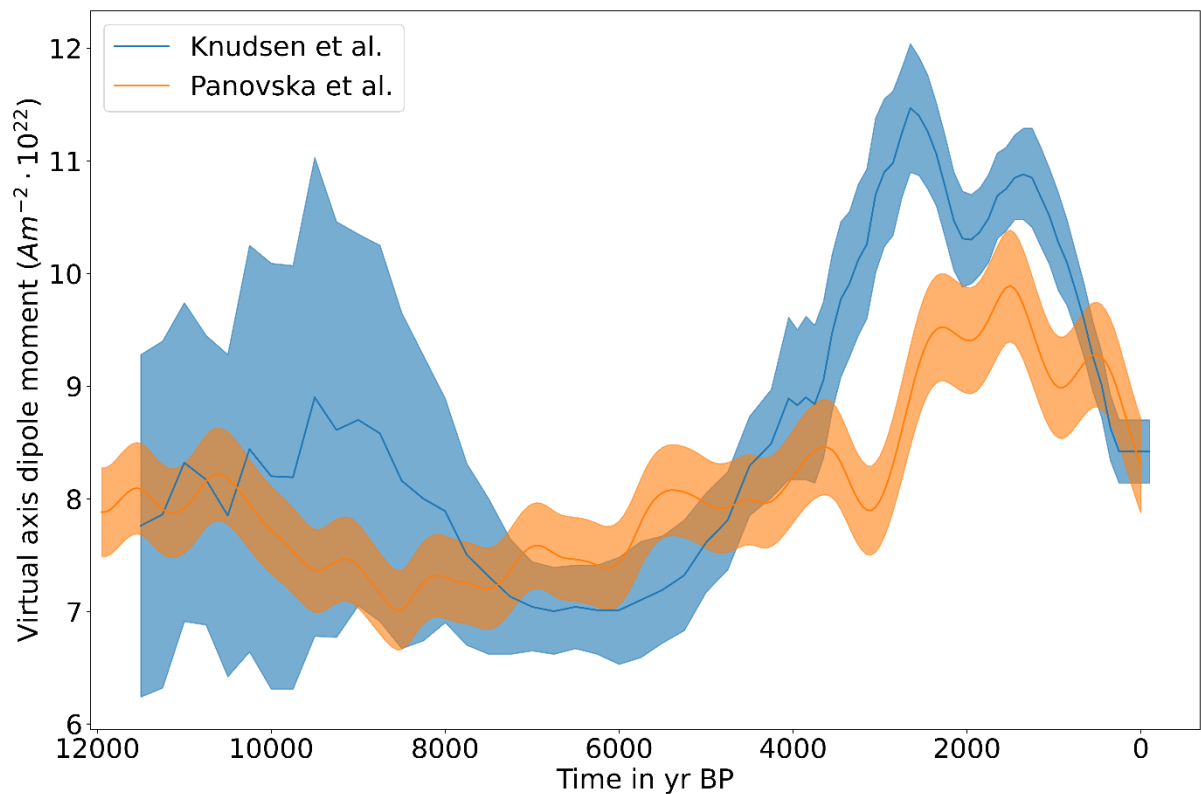

**Supplementary Fig. 5 Comparison of two geomagnetic field reconstructions.** Two geomagnetic field reconstructions by Knudsen et al.<sup>6</sup> (blue) and Panovska et al.<sup>7</sup> (orange) over the last 12000 years including 1- $\sigma$  uncertainty ranges.

### Supplementary References

- 1 Reimer, P. J. *et al.* The IntCal20 Northern Hemisphere Radiocarbon Age Calibration Curve (0–55 cal kBP). *Radiocarbon* **62**, 725-757, doi:10.1017/RDC.2020.41 (2020).
- 2 Miyake, F. *et al.* A Single-Year Cosmic Ray Event at 5410 BCE Registered in 14C of Tree Rings. *Geophys Res Lett* **48**, e2021GL093419, doi:10.1029/2021GL093419 (2021).
- 3 Sakurai, H. *et al.* Prolonged production of 14C during the ~660 BCE solar proton event from Japanese tree rings. *Scientific Reports* **10**, 660, doi:10.1038/s41598-019-57273-2 (2020).
- 4 Büntgen, U. *et al.* Tree rings reveal globally coherent signature of cosmogenic radiocarbon events in 774 and 993 CE. *Nature Communications* **9**, doi:10.1038/s41467-018-06036-0 (2018).
- 5 Brehm, N. *et al.* Eleven-year solar cycles over the last millennium revealed by radiocarbon in tree rings. *Nature Geoscience* **14**, 10-15, doi:10.1038/s41561-020-00674-0 (2021).
- 6 Knudsen, M. F. *et al.* Variations in the geomagnetic dipole moment during the Holocene and the past 50 kyr. *Earth and Planetary Science Letters* **272**, 319-329, doi:10.1016/j.epsl.2008.04.048 (2008).
- 7 Panovska, S., Constable, C. G. & Korte, M. Extending Global Continuous Geomagnetic Field Reconstructions on Timescales Beyond Human Civilization. *Geochemistry, Geophysics, Geosystems* **19**, 4757-4772, doi:10.1029/2018GC007966 (2018).
