# Supplementary material for: Tree rings reveal two strong solar proton events in 7176 and 5259 BCE
Source: Research Square preprint supplement (doi:10.21203/rs.3.rs-753272/v1), 2021-08-10
Supplement: Supplementary file 2 [file e604028bb521e7a4fb03080d.xlsx]

## Sheet: (a)
IntCal year (BCE)	IntCal d14C (‰)	IntCal d14C_sig (‰)	Alpine Larch time (yr BCE)	Alpine Larch d14C (‰)	Alpine Larch d14C_sig (‰)	German Oak time (yr BCE)	German Oak d14C (‰)	German Oak d14C_sig (‰)	Bristlecone Pine (USA) time (yr BCE)	Bristlecone Pine (USA) d14C (‰)	Bristlecone Pine (USA) d14C_sig (‰)
7236	93	3.4	7196	88.0236	2.70392	7175	105.166	2.41041	7200	82.7042	2.642
7231	90.9	3.2	7195	85.0932	2.65701	7174	100.627	2.4126	7199	86.7366	2.48976
7226	88.4	3.3	7194	79.6712	2.61777	7173	98.941	2.40093	7198	84.9176	2.55553
7221	85.9	3.5	7193	81.0835	2.63912	7172	96.5795	2.38627	7197	86.7125	2.50349
7216	84	3.4	7192	84.7212	2.6798	7171	91.1937	2.37724	7196	85.5983	2.53131
7211	82.9	3.3	7191	84.4162	2.6166	7170	95.1565	2.4305	7195	84.9563	2.46402
7206	82.5	3.4	7190	83.825	2.61764	7169	92.0968	2.39445	7194	82.8276	2.54027
7201	82.8	3.2	7189	87.0374	2.65678	7168	91.1732	2.46282	7189	83.0993	2.51799
7196	83.7	2.8	7188	82.1134	2.62104	7167	91.1307	2.37898	7188	80.7007	2.4701
7191	84.7	2.9	7187	83.4845	2.8238	7166	86.1219	2.37605	7187	86.6736	2.54114
7186	85.5	2.8	7185	83.5902	2.61039	7165	86.5676	2.37895	7186	81.0171	2.46974
7181	86.6	2.8	7183	89.6531	2.65196	7164	89.8845	2.41356	7185	87.0149	2.56767
7176	88.2	2.8	7182	82.326	2.63191	7163	86.7452	2.38951	7185	81.5314	2.85156
7171	89.5	2.9	7181	79.518	2.65807	7162	84.32	2.4092	7184	85.8189	2.49187
7166	89.2	2.8	7180	78.779	2.63973	7161	84.2002	2.38413	7183	85.8295	2.53864
7161	87.9	2.8	7179	82.1179	2.58328	7160	88.5732	2.40915	7181	78.5889	2.59459
7156	86.5	2.8	7178	81.0813	2.63013	7159	83.4781	2.40155	7180	83.418	2.47355
7151	85.4	2.9	7177	81.926	2.626	7158	84.105	2.39157	7179	80.5378	2.43657
7146	85	2.9	7176	103.887	2.66713	7157	85.6617	2.39432	7178	83.7403	2.4623
7141	85.5	3	7176	99.5805	2.93006	7156	84.9619	2.4612	7177	83.5645	2.47974
7136	86.7	2.9	7175	99.3754	2.62014	7155	88.2132	2.39589	7177	86.2822	2.46389
7131	87.7	3.1	7175	99.8442	2.93269	7154	87.1123	2.40484	7177	85.2089	2.91894
7126	87.7	3	7174	97.0479	2.67212	7153	86.602	2.39516	7176	95.9463	2.4951
7121	87	2.9	7173	93.9164	2.62705	7152	86.177	2.39254	7175	97.4654	2.49631
7116	86	2.8	7173	93.6281	2.92537	7150	84.9892	2.39397	7175	95.6337	2.4999
7111	84.9	2.8	7172	99.612	2.43948	7148	88.5494	1.93752	7174	101.113	2.50165
7106	82.9	3.1	7171	97.8857	2.43603	7147	83.1732	1.92051	7174	102.495	2.50739
7101	80.3	3	7171	102.406	3.02656	7146	83.859	1.91686	7174	97.4093	2.87249
7096	77.9	3	7170	90.7388	2.92121	7145	86.5593	1.92164	7173	97.0217	2.62596
7091	76.7	2.8	7169	95.743	2.91874	7144	86.8133	1.93482	7173	95.7833	2.49282
7086	77	2.7	7169	92.497	2.97122	7143	83.2679	1.9259	7173	99.4882	2.88291
7081	78.8	2.7	7167	95.6078	2.91833	7142	85.6506	1.92561	7172	89.6863	2.47715
7076	81.3	2.6	7167	88.352	2.92361	7141	84.7577	1.92411	7172	91.9662	2.47659
			7166	89.9436	2.90528	7139	86.8634	1.92797	7172	96.2625	2.90463
			7165	85.2336	2.88027	7138	84.21	1.92923	7171	95.9935	2.50748
			7164	87.6009	2.86708	7137	86.2739	1.93052	7171	90.2432	2.45738
			7163	89.9366	2.87942	7136	87.0216	1.92054	7171	93.8134	2.88164
			7162	85.9043	2.88167	7135	86.2478	1.92449	7170	95.0919	2.49959
			7161	83.4573	2.91018	7134	86.3783	1.93219	7170	91.5449	2.8695
			7160	86.9707	2.84705	7133	87.344	1.92705	7169	87.6968	2.49449
			7159	83.407	2.88075	7132	86.7634	1.92485	7168	90.2899	2.49647
			7158	80.8527	2.88949	7131	88.9912	1.92673	7166	90.7111	2.52409
			7157	83.3069	2.86438	7130	86.7945	1.9223	7165	89.4615	2.46685
			7156	83.5979	2.8726	7129	84.8703	1.92345	7164	87.7387	2.54018
			7155	80.9046	2.89046	7128	84.7736	1.92432	7163	87.4806	2.53942
			7154	83.6749	2.8731	7127	86.1769	1.94069	7162	81.7464	2.48117
			7153	81.9779	2.8842	7126	84.374	1.9221	7161	83.6179	2.50268
			7152	78.6488	2.9089	7125	86.9241	1.91983	7160	82.9673	2.49438
			7151	78.5918	2.87353	7124	87.2877	1.91985	7159	86.107	2.48243
			7150	84.1868	2.89813	7123	86.0825	1.92674	7158	81.2628	2.46721
			7149	83.9504	2.87776	7106	80.7646	2.6222	7157	80.7866	2.45999
			7148	75.9099	2.93508	7105	90.6486	2.61698	7156	88.6278	2.48764
			7147	82.9086	2.94648	7104	84.3331	2.47868	7155	85.4676	2.47218
						7103	84.3378	2.61822	7154	85.4808	2.51904
						7101	83.4506	2.58103	7153	84.4973	2.52019
						7100	81.5561	2.58826	7152	84.9515	2.52839
						7099	81.5363	2.57367	7151	87.4081	2.53251
						7098	80.9597	2.58109	7150	84.332	2.46673
						7097	80.5779	2.59724
						7096	81.3246	2.60377
						7095	78.1867	2.5801
						7094	80.8667	2.60183
						7093	76.68	2.60652
						7092	80.7645	2.58322
						7091	79.9211	2.66681
						7220	91.6252	2.47045
						7220	97.1595	2.57655
						7219	89.6814	2.54924
						7219	95.2817	2.58137
						7218	90.7658	2.5286
						7218	91.2162	2.55189
						7217	89.6545	2.55776
						7217	87.1529	2.59889
						7216	88.2621	2.54784
						7216	94.0663	2.57967
						7215	84.1294	2.54511
						7215	93.333	2.55383
						7214	89.3517	2.49863
						7214	88.8463	2.58231
						7213	88.9909	2.51916
						7213	87.8735	2.64612
						7212	86.0344	2.52715
						7212	86.5477	2.55792
						7211	84.3211	2.48636
						7211	89.8984	2.54702
						7210	85.7671	2.42768
						7210	85.6531	2.54137
						7209	83.3522	2.46935
						7209	85.2436	2.54797
						7208	83.4474	2.47876
						7208	89.272	2.53288
						7207	86.3307	2.5273
						7207	82.5751	2.5436
						7206	87.9725	2.4989
						7206	81.4327	2.57551
						7205	84.6413	2.49671
						7205	81.458	2.58963
						7204	78.5399	2.47412
						7204	85.8897	2.61649
						7203	82.8042	2.50769
						7203	85.6831	2.60769
						7202	85.7896	2.51943
						7202	81.9953	2.58305
						7201	83.5595	2.50482
						7201	85.4776	2.56196
						7200	84.4159	2.5189
						7200	81.5469	2.60967
						7199	87.4496	2.26668
						7198	88.4984	2.29248
						7198	86.0537	2.48822
						7197	86.069	2.29247
						7196	83.5795	2.29654
						7196	83.3179	2.48495
						7195	81.2596	2.28551
						7194	82.5413	2.28719
						7194	83.0229	2.48662
						7193	80.2846	2.28603
						7192	84.2144	2.29714
						7192	74.0192	2.53608
						7191	80.4416	2.27403
						7191	82.4412	2.39428
						7190	85.6468	2.27227
						7190	78.3095	2.5058
						7189	83.9798	2.29024
						7188	82.7215	2.26626
						7188	79.2567	2.49101
						7188	83.1631	2.45699
						7187	81.2836	2.29559
						7187	78.3892	2.44494
						7186	79.6362	2.32861
						7186	79.0452	2.50684
						7186	82.1428	2.46521
						7185	84.2983	2.30926
						7185	84.058	2.44187
						7184	79.7005	2.32119
						7184	78.2931	2.50386
						7184	80.753	2.46227
						7183	82.7118	2.32051
						7183	80.5784	2.46759
						7182	82.8304	2.2974
						7182	76.8232	2.48136
						7182	82.5428	2.48793
						7181	79.7838	2.31961
						7181	81.9296	2.45669
						7180	83.6866	2.28189
						7180	76.2187	2.48476
						7180	80.0781	2.47045
						7179	80.9898	2.28343
						7179	79.1633	2.45006
						7178	79.8106	2.2816
						7178	78.4818	2.55112
						7178	80.0396	2.4427
						7177	85.5535	2.28246
						7177	83.9604	2.40801
						7175	101.809	2.3469
						7175	103.808	2.42934
						7174	100.699	2.31001
						7174	96.39	2.53778
						7174	100.618	2.4381
						7173	99.4703	2.50106
						7173	93.8338	2.42231
						7172	96.1487	2.46761
						7172	92.4861	2.52286
						7172	96.7125	2.4162
						7171	92.7458	2.45657
						7171	94.3997	2.40958
						7170	86.8317	2.4655
						7170	91.6777	2.521
						7170	93.5036	2.41488
						7169	89.1514	2.44474
						7169	94.1215	2.41258
						7168	92.224	2.46644
						7168	93.9798	2.53078
						7168	92.817	2.42188
						7167	88.7466	2.47146
						7166	86.3369	2.48072
						7166	85.2036	2.52218
						7166	92.9737	2.40375
						7165	87.3365	2.45582
						7164	86.6467	2.46339
						7164	83.1293	2.51201
						7163	89.9368	2.46432
						7162	87.4362	2.47428
						7162	83.3829	2.51364
						7161	86.5161	2.45475
						7160	92.6185	2.47545
						7160	84.5119	2.48294
						7178.1	81.5489	2.48621
						7178.1	81.4133	2.40067
						7177.9	84.895	2.50359
						7177.9	81.1791	2.47542
						7177.9	85.6555	2.40265
						7177.1	82.1758	2.52441
						7176.9	79.6014	2.49976
						7176.9	84.071	2.48259
						7176.1	94.2892	2.50853
						7175.9	101.038	2.53576
						7175.9	98.8024	2.4996
						7175.1	102.152	2.53227
						7174.9	99.7867	2.5299
						7174.9	98.6405	2.50211
						7177.1	79.0574	2.5181
						7177.1	81.7278	2.50621
						7177.1	84.9782	2.48212
						7176.9	79.1472	2.49641
						7176.9	84.2297	2.50831
						7176.9	83.3125	2.50091
						7176	100.778	2.92502
						7176	92.4417	2.42618
						7176	93.059	2.94757
						7176	94.981	2.41114

## Sheet: (b)
IntCal year (BCE)	IntCal d14C (‰)	IntCal d14C_sig (‰)	Irish Oak time (yr BCE)	Irish Oak d14C (‰)	Irish Oak d14C_sig (‰)	Bristlecone Pine (USA) time (yr BCE)	Bristlecone Pine (USA) d14C (‰)	Bristlecone Pine (USA) d14C_sig (‰)	Alpine Larch time (yr BCE)	Alpine Larch d14C (‰)	Alpine Larch d14C_sig (‰)	Sibirian Larch time (yr BCE)	Sibirian Larch d14C (‰)	Sibirian Larch d14C_sig (‰)
5316	92.6	2.6	5181	101.496	2.27783	5271	95.4966	2.57686	5271	99.1223	2.273	5272	94.7506	2.27881
5311	94.2	2.5	5182	102.227	2.29111	5270	92.2479	2.53236	5270	97.4777	2.2574	5271	97.916	2.29066
5306	96.2	2.4	5184	104.496	2.29019	5269	92.0603	2.5908	5270	97.6501	2.94118	5271	101.32	2.71086
5301	98.1	2.5	5185	109.255	2.29786	5268	95.3292	2.59396	5269	97.8323	2.25487	5270	96.4261	2.27399
5296	99.6	2.7	5186	107.872	2.32362	5267	96.8734	2.59037	5268	94.4757	2.25353	5269	95.0577	2.26925
5291	100.5	2.6	5187	107.093	2.3002	5266	90.1342	2.66366	5268	90.6355	2.99593	5269	94.4044	2.69785
5286	100.8	2.4	5189	104.594	2.30083	5265	96.6843	2.57458	5267	98.9534	2.26246	5268	96.0691	2.28772
5281	100.6	2.5	5191	107.451	2.28633	5265	94.4716	2.53628	5266	98.4625	2.26605	5268	94.8242	2.70284
5276	99.8	2.8	5192	104.928	2.28815	5264	96.4513	2.58056	5266	95.04	3.04234	5267	94.7641	2.29623
5271	98.5	2.9	5193	104.383	2.29789	5264	96.4505	2.55672	5265	93.9264	2.25888	5267	94.5662	2.70404
5266	96.9	2.9	5194	104.461	2.28681	5263	94.917	2.54884	5265	92.0003	3.12915	5266	96.0827	2.29607
5261	94.9	3	5198	103.121	2.382	5263	98.5242	2.5545	5264	96.4544	2.25394	5266	94.0607	2.68605
5256	92.9	3.1	5199	101.522	2.3144	5262	94.9509	2.57857	5263	94.6416	2.26028	5265	97.8545	2.29625
5251	90.9	3.4	5200	98.3046	2.29592	5261	88.5371	2.58993	5263	89.5545	3.18072	5265	98.7758	2.70119
5246	89.1	3.6	5201	98.2954	2.2963	5260	104.725	2.616	5262	96.7042	2.25781	5264	94.8191	2.28932
5241	87.6	3.6	5207	93.4458	2.28436	5259	109.427	2.59084	5261	94.7679	2.29831	5264	97.09	2.71245
5236	86.6	3.3	5210	95.4145	2.29435	5259	113.423	2.6306	5261	95.3277	3.06612	5263	95.6623	2.27301
5231	86.2	3	5216	89.207	2.13147	5258	110.244	2.5818	5260	95.0085	2.29145	5263	95.2506	2.69564
5226	86.8	2.9	5217	91.6559	2.134	5257	110.701	2.57194	5259	113.854	2.31989	5262	92.1916	2.27823
5221	88.8	3.1	5223	93.3004	2.08045	5256	111.099	2.58242	5259	113.615	3.1202	5262	94.119	2.73111
5216	92.2	2.9	5224	89.3208	2.09176	5255	107.042	2.58377	5258	113.99	2.31946	5261	96.2072	2.2728
5211	96.8	2.7	5225	89.6696	2.1174	5255	105.497	2.56087	5257	112.985	2.31542	5261	92.287	2.70762
5206	101.4	2.7	5226	94.7129	2.15821	5254	105.463	2.63145	5257	108.19	2.90871	5260	89.542	2.36462
5201	104.9	2.9	5227	92.0179	2.1496	5253	104.555	2.58441	5256	111.138	2.28426	5260	94.106	2.67167
5196	106.3	2.8	5230	91.7899	2.13633	5252	98.7044	2.54537	5255	109.767	2.28667	5259	110.929	2.40981
5191	105.4	2.5	5231	94.1203	2.11305	5251	100.388	2.60189	5255	107.621	2.9301	5259	110.492	2.7453
5186	103.2	2.6	5235	92.8702	2.14169	5263	94.8845	2.71661	5254	108.953	2.2687	5258	112.168	2.32156
5181	100.7	2.7	5237	93.492	2.13941	5263	98.0413	2.70197	5253	103.366	2.26322	5258	114.928	2.72377
5176	98.5	2.5	5238	94.3379	2.11662	5262	97.8232	2.70948	5253	113.499	3.01149	5257	111.785	2.29481
5171	96.8	2.6	5239	91.7627	2.42541	5261	93.829	2.71192	5252	105.309	2.26759	5257	110.593	2.73671
5166	95.4	2.9	5240	97.395	2.19043	5260	107.185	2.73185	5251	104.109	2.26832	5256	112.848	2.30986
			5241	95.9272	2.18555	5260	100.567	2.68076	5251	99.457	2.92852	5256	111.386	2.72583
			5242	98.7435	2.17922	5259	107.988	2.75216	5250	98.7712	2.26058	5255	108.692	2.41941
			5243	96.1425	2.19432	5258	112.258	2.74596	5249	95.6248	2.25254	5255	105.141	2.73614
			5244	96.348	2.18687	5258	105.845	2.70673	5249	92.5214	2.94433	5254	105.208	2.29669
			5245	98.4315	2.19071	5257	110.08	2.72721	5248	97.6833	2.26365	5254	104.194	2.72488
			5246	101.17	2.19954	5256	106.856	2.72428	5247	100.638	2.26652	5253	106.44	2.25138
			5247	97.6144	2.19238	5256	107.421	2.72893	5247	98.9479	2.95041	5253	102.569	2.80398
			5248	98.7029	2.18961	5255	105.364	2.72137	5246	98.9449	2.2561	5252	103.766	2.25274
			5249	101.62	2.19886	5254	103.258	2.6961				5252	101.776	2.714
			5250	98.1394	2.20571	5253	101.317	2.69851				5251	98.827	2.26046
			5252	103.467	2.20516	5253	101.643	2.70313				5251	98.0735	2.69595
			5253	105.826	2.20758	5252	98.6554	2.6739				5250	96.7718	2.24864
			5254	107.833	2.20438	5252	100.959	2.71179				5250	98.8526	2.70682
			5255	106.264	2.1965	5251	98.7834	2.69848				5249	96.3268	2.27363
			5256	111.699	2.21147							5249	98.8141	2.69547
			5257	109.366	2.22193							5248	96.0896	2.2849
			5258	114.742	2.21408							5248	96.7486	2.70917
			5259	112.963	2.46672							5247	95.209	2.27871
			5261	90.8264	2.42974							5247	98.289	2.7102
			5262	91.8926	2.42222
			5263	88.6028	2.48223
			5264	95.9448	2.41496
			5265	94.202	2.41982
			5266	92.8848	2.41817
			5267	93.2431	2.4178
			5268	95.23	2.41701
			5269	91.9837	2.41306
			5270	96.1637	2.42454
			5271	97.328	2.42745
			5272	99.2932	2.42434
			5273	96.0533	2.427
			5274	100.501	2.42667
			5275	98.0668	2.50183
			5276	98.3582	2.44438
			5277	97.7858	2.43297
			5278	98.7848	2.43447
			5279	100.401	2.49208
			5281	103.793	2.4947
			5282	101.544	2.4889
			5283	96.7232	2.47816
			5284	100.986	2.50099
			5285	100.413	2.48163
			5286	102.77	2.49342
			5287	107.447	2.08746
			5288	102.796	2.05321
			5289	100.895	2.04883
			5289	102.271	2.06965
			5290	102.064	2.06552
			5291	106.567	2.11101
			5292	103.797	2.10365
			5293	103.817	2.09707
			5294	99.457	2.0899
			5295	98.2865	2.08137
			5296	97.6442	2.08447
			5297	101.158	2.08204
			5298	97.9786	2.08698
			5299	96.7428	2.10111
			5300	99.5339	2.08475
			5300	100.826	2.54754
			5298	96.9078	2.30665
			5296	105.41	2.45022
			5295	96.9421	2.13768
			5295	100.449	2.13768
			5294	99.3071	2.4016
			5292	101.73	2.11289
			5291	105.342	2.13665
			5289	101.547	2.47215
			5288	98.8455	2.27986
			5287	100.248	2.30358
			5285	100.63	2.15909
			5284	103.495	2.39869
			5283	104.801	2.49434
			5281	105.205	2.13406
			5280	102.482	2.49343
			5280	104.112	2.51741
			5278	103.869	2.30108
			5277	98.0075	2.39666
			5275	101.001	2.46797
			5274	98.1362	2.41975
			5272	97.3197	2.27545
			5272	101.439	2.29941
			5271	98.1449	2.13148
			5269	97.7835	2.39435
			5269	95.3892	2.39435
			5268	97.9141	2.51376
			5266	97.1698	2.13019
			5265	94.3089	2.39319
			5263	95.384	2.2969
			5262	91.7827	2.12916
			5261	93.4446	2.29635
			5259	106.668	2.41537
			5258	116.051	2.4629
			5257	109.532	2.41478
			5256	105.788	2.10371
			5254	109.273	2.151
			5253	104.814	2.31802
			5251	101.13	2.4847
			5250	97.8433	2.41274
			5249	102.989	2.46022
			5246	93.5875	2.50708
			5245	93.7417	2.12479
			5243	98.4417	2.29135
			5242	97.0917	2.4104
			5241	94.5489	2.12376
			5240	94.8698	2.40982
			5237	93.9002	2.12273
			5235	91.3226	2.40836
			5234	93.2887	2.28886
			5233	94.6345	2.38394
			5232	91.1888	2.28831
			5231	88.5066	2.09736
			5230	89.924	2.38308
			5227	84.6926	2.38221
			5226	91.731	2.28665
			5225	94.5998	2.45308
			5224	92.348	2.28609
			5223	89.2158	2.11914
			5222	96.2025	2.40458
			5220	90.8676	2.28499
			5217	91.2094	2.4983
			5216	86.9378	2.40283
			5215	89.1613	2.11709
			5213	91.8706	2.40196
			5212	90.9538	2.11633
			5210	92.0688	2.44864
			5208	93.5396	2.37674
			5206	96.8394	2.49498
			5205	93.5943	2.09078
			5204	96.8353	2.28057
			5202	91.1312	2.28002
			5201	97.7197	2.13726
			5198	96.728	2.39761
			5197	102.244	2.46853
			5195	98.0149	2.30182
			5194	101.275	2.27781
			5192	105.041	2.41959
			5191	107.28	2.4193
			5190	105.082	2.39529
			5189	106.466	2.46614
			5188	105.432	2.1339
			5185	102.068	2.39384
			5184	104.636	2.51204
			5183	102.251	2.13261
			5182	103.729	2.2982
			5181	101.464	2.27423
			5180	103.462	2.08446
			5179	98.9234	2.29737
			5178	97.6301	2.43918
			5175	93.9651	2.39095
			5176	100.916	2.60432
			5177	99.1549	2.60463
			5186	106.989	2.60747
			5193	102.945	2.60968
			5196	103.583	2.61063
			5199	102.084	2.61157
			5200	95.8061	2.61189
			5207	92.9321	2.6141
			5214	85.0576	2.61632
			5218	93.6734	2.61758
			5221	98.8313	2.85658
			5228	92.3764	2.62075
			5238	90.5976	2.62392
			5244	98.0733	2.62583
			5247	97.2779	2.62678
			5260	92.0687	2.63091
			5264	93.315	2.63219
			5270	96.264	2.6341
			5270	92.9115	2.39464
			5279	103.691	2.63697
			5293	98.5978	2.64144
			5297	104.895	2.64272
